# Supplementary material for: An Integrative Study of Protein-RNA Condensates Identifies Scaffolding RNAs and Reveals Players in Fragile X-Associated Tremor/Ataxia Syndrome
Source: PubMed Central journal article supplement — Cell Rep. 2018 Dec 18;25(12):3422–3434.e7. doi: 10.1016/j.celrep.2018.11.076 (PMC6315285; doi:10.1016/j.celrep.2018.11.076), 2018-12-18
Supplement: mmc7.pdf [file mmc7.pdf]

## An Integrative Study of Protein-RNA Condensates Identifies Scaffolding RNAs and Reveals Players in Fragile X-Associated Tremor/Ataxia Syndrome

### Graphical Abstract

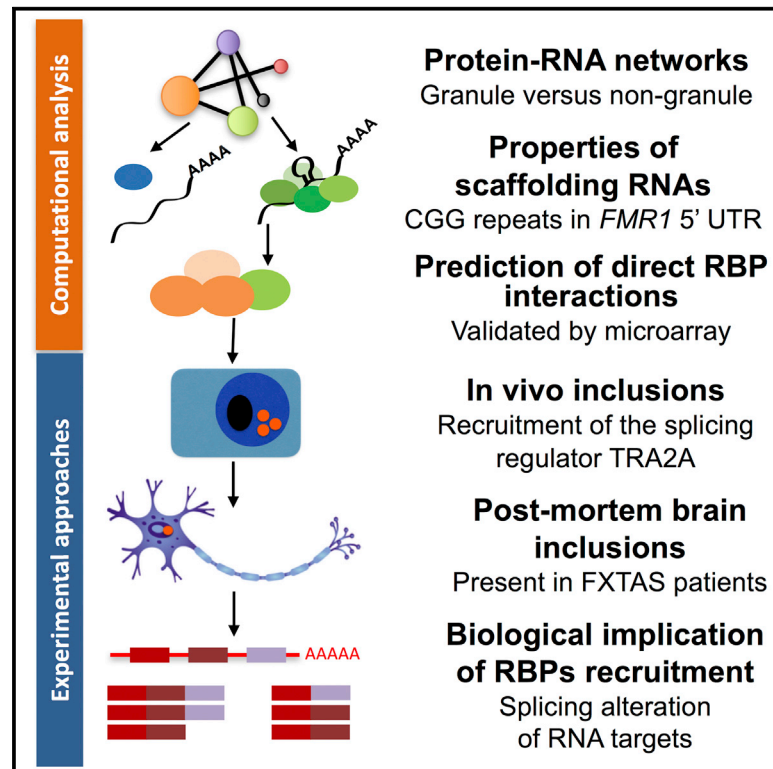

### Authors

Fernando Cid-Samper, Mariona Gelabert-Baldrich, Benjamin Lang, ..., Renate K. Hukema, Teresa Botta-Orfila, Gian Gaetano Tartaglia

### Correspondence

teresa.botta@idibaps.org (T.B.-O.), gian@tartaglialab.com (G.G.T.)

### In Brief

Cid-Samper et al. analyze protein-RNA networks and identify properties of RNA scaffolds within biological condensates. They find that CGG repeats in the 3' UTR of *FMR1* attract several proteins, including the splicing factor TRA2A that co-aggregates in fragile X-associated tremor/ataxia syndrome (FXTAS).

### Highlights

- Highly contacted granule RNAs are structured and contain long, repetitive UTRs
- Mutations related with FXTAS increase *FMR1* scaffolding propensity
- TRA2A co-aggregates with *FMR1* in FXTAS mouse model and in post-mortem human samples
- TRA2 sequestration has both transcriptomic and post-transcriptomic implications

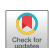

# An Integrative Study of Protein-RNA Condensates Identifies Scaffolding RNAs and Reveals Players in Fragile X-Associated Tremor/Ataxia Syndrome

Fernando Cid-Samper,<sup>1</sup> Mariona Gelabert-Baldrich,<sup>1</sup> Benjamin Lang,<sup>1</sup> Nieves Lorenzo-Gotor,<sup>1</sup> Riccardo Delli Ponti,<sup>1</sup> Lies-Anne W.F.M. Severijnen,<sup>2</sup> Benedetta Bolognesi,<sup>1,8</sup> Ellen Gelpi,<sup>3,4</sup> Renate K. Hukema,<sup>2</sup> Teresa Botta-Orfila,<sup>1,9,\*</sup> and Gian Gaetano Tartaglia<sup>1,5,6,7,10,\*</sup>

<sup>1</sup>Centre for Genomic Regulation (CRG), The Barcelona Institute for Science and Technology, Dr. Aiguader 88, 08003 Barcelona, Spain

<sup>2</sup>Department of Clinical Genetics, Erasmus MC, 3000 CA Rotterdam, the Netherlands

<sup>3</sup>Neurological Tissue Biobank of the Hospital Clinic and Institut d'Investigacions Biomèdiques August Pi i Sunyer (IDIBAPS), Carrer del Rosselló, 149, 08036, Barcelona, Spain

<sup>4</sup>Institute of Neurology, Medical University of Vienna, Währinger Gürtel 18-20, 1090 Vienna, Austria

<sup>5</sup>Universitat Pompeu Fabra (UPF), 08003 Barcelona, Spain

<sup>6</sup>Department of Biology 'Charles Darwin', Sapienza University of Rome, P.le A. Moro 5, Rome 00185, Italy

<sup>7</sup>Institució Catalana de Recerca i Estudis Avançats (ICREA), 23 Passeig Lluís Companys, 08010 Barcelona, Spain

<sup>8</sup>Present address: Institute for Bioengineering of Catalunya, The Barcelona Institute of Science and Technology, Carrer de Baldri Reixac, 10-12, 08028 Barcelona, Spain

<sup>9</sup>Present address: DNA and Fluids Biobank of the Institut d'Investigacions Biomèdiques August Pi i Sunyer (IDIBAPS), Carrer Rosselló 149, 08036 Barcelona, Spain

<sup>10</sup>Lead Contact

\*Correspondence: [teresa.botta@idibaps.org](mailto:teresa.botta@idibaps.org) (T.B.-O.), [gian@tartagliolab.com](mailto:gian@tartagliolab.com) (G.G.T.)  
<https://doi.org/10.1016/j.celrep.2018.11.076>

## SUMMARY

Recent evidence indicates that specific RNAs promote the formation of ribonucleoprotein condensates by acting as scaffolds for RNA-binding proteins (RBPs). We systematically investigated RNA-RBP interaction networks to understand ribonucleoprotein assembly. We found that highly contacted RNAs are structured, have long UTRs, and contain nucleotide repeat expansions. Among the RNAs with such properties, we identified the *FMR1* 3' UTR that harbors CGG expansions implicated in fragile X-associated tremor/ataxia syndrome (FXTAS). We studied *FMR1* binding partners *in silico* and *in vitro* and prioritized the splicing regulator *TRA2A* for further characterization. In a FXTAS cellular model, we validated the *TRA2A-FMR1* interaction and investigated implications of its sequestration at both transcriptomic and post-transcriptomic levels. We found that *TRA2A* co-aggregates with *FMR1* in a FXTAS mouse model and in post-mortem human samples. Our integrative study identifies key components of ribonucleoprotein aggregates, providing links to neurodegenerative disease and allowing the discovery of therapeutic targets.

## INTRODUCTION

Proteins and RNAs coalesce in large phase-separated condensates that are implicated in several cellular processes (Jiang et al., 2015; Woodruff et al., 2017).

Among the most studied condensates are ribonucleoprotein (RNP) granules that assemble in liquid-like cellular compartments composed of RNA-binding proteins (RBPs) (Hyman et al., 2014; Maharana et al., 2018) that are in dynamic exchange with the surrounding environment (Bolognesi et al., 2016). RNP granules, such as processing bodies and stress granules (SGs), are evolutionarily conserved from yeast to human (Brangwynne et al., 2009; Jain et al., 2016; Riback et al., 2017) and contain constitutive protein components, such as G3BP1 (yeast: Nxt3), TIA1 (Pub1), and TIAR (Ngr1) (Buchan et al., 2008). Several granule-forming RBPs are prone to form amyloid aggregates upon amino acid mutations (Hyman et al., 2014; Kato et al., 2012) that induce a transition from a liquid droplet to a solid phase (Qamar et al., 2018). This observation has led to the proposal that a liquid-to-solid phase transition is a mechanism of cellular toxicity (Patel et al., 2015) in diseases, such as amyotrophic lateral sclerosis (ALS) (Murakami et al., 2015) and myotonic dystrophy (Pettersson et al., 2015).

All the components of molecular complexes need to be physically close to each other to perform their functions. One way to achieve this, while keeping selectivity in a crowded cell, is to use platform or scaffold molecules that piece together components of a complex or a pathway. Indeed, RBPs are known to act as scaffolding elements promoting RNP assembly through protein-protein interactions (PPIs) (Bannani et al., 2017); yet, protein-RNA interactions (PRIs) also play a role in the formation of condensates. Recent work based on G3BP1 pull-down indicates that 10% of the human transcripts can assemble into SGs (Khong et al., 2017). If distinct RNA species are present in the condensates, a fraction of them could be involved in mediating RBP recruitment. In this regard, we previously observed that different RNAs act as scaffolds for RNP complexes (Ribeiro et al., 2018), which indicates that

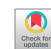

specific transcripts might promote the formation of RNP condensates.

Combining PPI and PRI networks revealed by enhanced cross-linking and immunoprecipitation (eCLIP) (Van Nostrand et al., 2016) and mass spectrometric analysis of SGs (Jain et al., 2016), we identified a class of transcripts that bind to a large number of proteins and, therefore, qualify as potential scaffolding elements. In agreement with recent literature reports, we found that UTRs have a particularly strong potential to bind proteins in RNP granules, especially when they contain specific homo-nucleotide repeats (Saha and Hyman, 2017). In support of this observation, several diseases, including myotonic dystrophy (MD) and a number of ataxias (spinocerebellar ataxia [SCA]), have been reported to be linked to expanded trinucleotide repeats that trigger the formation of intranuclear condensates in which proteins are sequestered and functionally impaired. Specifically, expanded RNA repeats lead to RNA-mediated condensate formation in DM1 (Mooers et al., 2005), SCA8 (Mutsuddi et al., 2004), and SCA10 (White et al., 2010).

By understanding the characteristics of RNAs involved in RNP assembly, we aim to unveil the molecular details of specific human diseases. Indeed, the appearance of RNP condensates, often called inclusions or foci, is not only linked to ALS, Huntington's disease, and MD but also other diseases, such as fragile X-associated tremor/ataxia syndrome (FXTAS) (Tassone et al., 2004; Sellier et al., 2017). The onset and development of FXTAS is currently explained by two main mechanisms (Botta-Orfila et al., 2016): (1) RNA-mediated recruitment of proteins attracted by CGG trinucleotide repeats in the 5' UTR of fragile X mental retardation protein (*FMR1*) RNA and (2) aggregation of repeat-associated non-AUG (RAN) polyglycine peptides translated from the *FMR1* 5' UTR (FMRpolyG) (Todd et al., 2013). Previous work indicates that *FMR1* inclusions contain specific proteins, such as HNRNP A2/B1, MBNL1, LMNA, and INA (Iwahashi et al., 2006). Also, FMRpolyG peptides (Sellier et al., 2017) have been found in the inclusions, together with CUGBP1, KHDRBS1, and DGCR8 that are involved in splicing regulation and mRNA transport regulation of microRNA regulation (Sellier et al., 2010, 2013). Although KHDRBS1 does not bind physically (Sellier et al., 2010), its protein partner DGCR8 interacts with CGG repeats (Sellier et al., 2013), indicating that sequestration is a process led by a pool of proteins that progressively attract other networks.

Notably, CGG repeats contained in the *FMR1* 5' UTR are of different lengths (the most common allele in Europe being of 30 repeats). At over 200 repeats, methylation and silencing of the *FMR1* gene block FMRP protein expression (Todd et al., 2013). The premutation range (55–200 CGG repeats) is instead accompanied by appearance of foci that are the typical hallmark of FXTAS (Todd et al., 2013). These foci are highly dynamic and behave as RNP condensates that phase separate in the nucleus forming inclusions (Tassone et al., 2004). Although long lived, they rapidly dissolve upon tautomycin treatment, which indicates liquid-like behavior (Strack et al., 2013).

The lability of *FMR1* inclusions, which impedes their biochemical characterization (Mitchell et al., 2013; Marchese et al., 2016), complicates the identification of RBPs involved in FXTAS. As shown in previous studies of RNP networks (Cirillo et al., 2017; Marchese et al., 2017), computational methods can

be exploited to identify key partners of RNA molecules. New contributions from other research areas are needed, especially because FXTAS pathological substrate is still under debate and there is still insufficient knowledge of targets for therapeutic intervention (Todd et al., 2013; Sellier et al., 2017). Here, we propose an integrative approach to identify new markers based on the properties of PRI networks and characteristics of scaffolding RNAs.

## RESULTS

In this work, we exploited a high-throughput computational approach to investigate the physico-chemical properties of scaffolding RNAs (Figure 1A). We focused on the experimental characterization of *FMR1* that we predict to bind a large number of RBPs. Among the *FMR1* partners that we identified, we selected the splicing regulator TRA2A and studied the biological consequences of its recruitment in RNP condensates. We used murine and post-mortem human tissues to assess TRA2A involvement in FXTAS.

### Protein-Protein Networks Do Not Discriminate Granule and Non-Granule RBPs

We first studied if RBPs phase-separating in RNP condensates interact with specific sets of proteins and RNAs. To discriminate proteins that are in RNP condensates (granule RBPs) from other RBPs (non-granule RBPs), we relied on recent proteomics data on human and yeast SGs (STAR Methods; Table S1A) as well as computational methods. The PRI datasets were identified through eCLIP (human) (Van Nostrand et al., 2016) and microarray (yeast) (Mittal et al., 2011) studies (Table S1B).

We analyzed if granule and non-granule RBPs show different interaction network properties. To this aim, we used available PPI datasets (STAR Methods) (Huttlin et al., 2015; Mittal et al., 2011). We based the topological analysis on three centrality measures describing the importance of a node (protein) within the network. For each protein, we computed the degree (number of protein interactions), betweenness (number of paths between protein pairs), and closeness centrality (how close one protein is to other proteins in the network). We found that granule and non-granule RBP networks display very similar topology both in yeast and human datasets (Figure 1B; Figures S1A and S1B).

### Protein-RNA Networks Robustly Discriminate Granule and Non-Granule RBPs

In both yeast and human, we found that PRIs significantly increase the centrality measures of the granule network (Figure 1B; Figures S1C and S1D). Importantly, human and yeast granule RBPs interact with more transcripts than other RBPs (Figure 1C; Figure S2; Tables S1C–S1F; yeast p value = 0.02, human p value = 0.003, Wilcoxon rank-sum test; STAR Methods). Such a difference holds even when looking independently at either coding or non-coding RNAs (Figure S2; coding p value = 0.003, non-coding p value = 0.01, Wilcoxon rank-sum test) and upon normalization by transcript length (yeast p value = 0.02; human p value = 0.002, Wilcoxon rank-sum test).

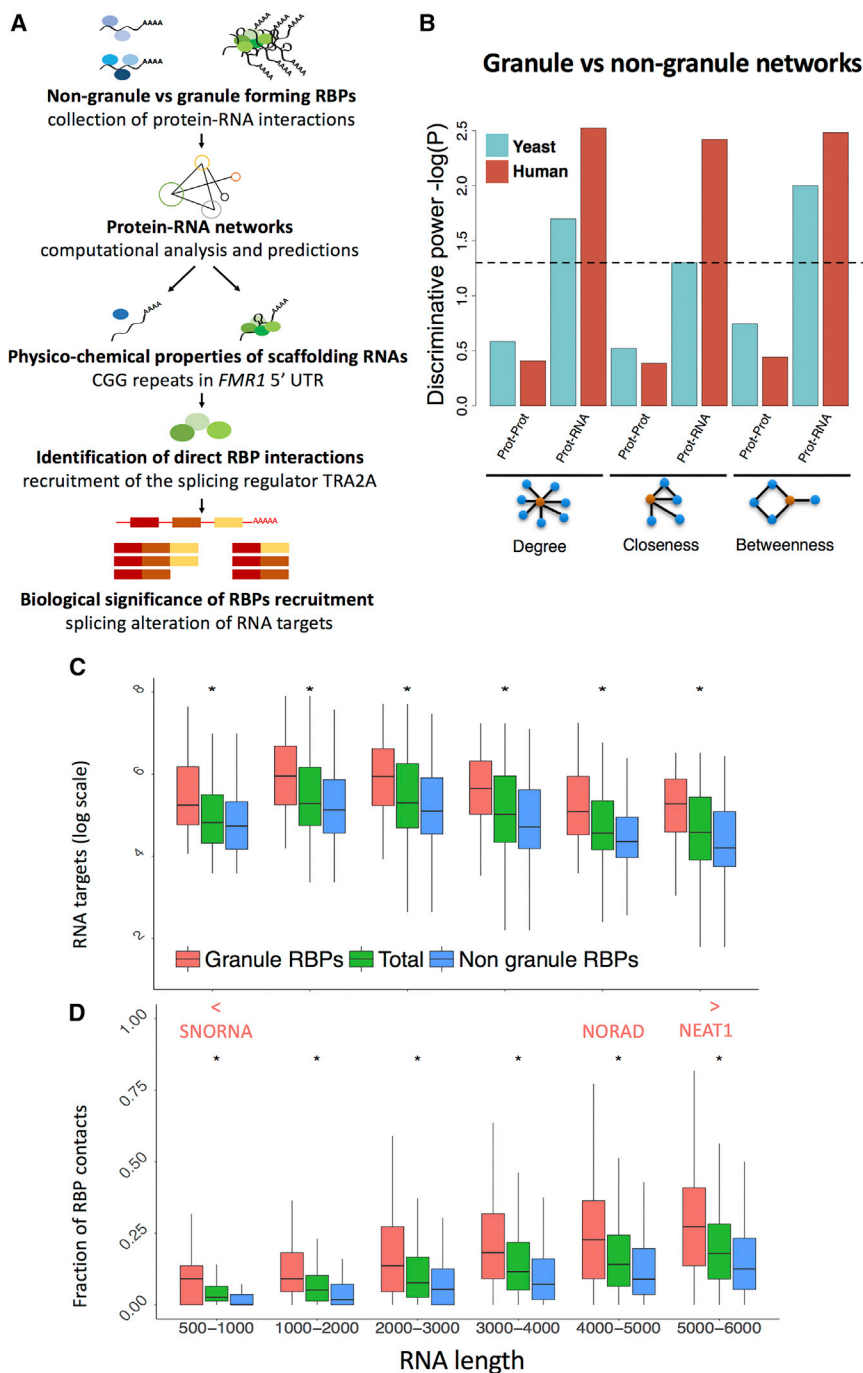

**Figure 1. RNA as a Key Element in RNP Condensates**

(A) We explored the differences between granule and non-granule RBPs by using an interaction network approach. We first studied the physico-chemical properties of scaffolding RNAs and prioritized *FMR1* 5' UTR for experimental characterization. We retrieved known RBPs and identified *FMR1* partners involved in FXTAS, including splicing factors. We evaluated the biological consequences of RBP recruitment in cellular context and the presence of ribonucleoprotein (RNP) complexes in FXTAS brain inclusions.

(B) Statistical differences between granule and non-granule elements (proteins or RNA) in protein-protein interaction (PPI) and protein-RNA interaction (PRI) networks. Only when analyzing RNA interactions, granule and non-granule networks show different topologies (Figures S1C and S1D).

(C) Independently of RNA length, granule RBPs contact more transcripts than non-granule RBPs ("total" indicates all RBPs regardless of their granule or non-granule definition; \* indicates p value < 0.01; Kolmogorov-Smirnov [KS] test).

(D) Transcripts interact more frequently with granule than non-granule RBPs. The fractions of granule and non-granule RBP contacts, monitored at different lengths, show consistent enrichments (p value < 0.01; KS test). Highly contacted transcripts are enriched in small nuclear RNAs (snRNAs) and small nucleolar RNAs (snoRNAs) (p value <  $2.2 \times 10^{-16}$ , Wilcoxon rank-sum test). Already described scaffolding RNAs such as NEAT1 are also identified.

protein contacts than RNAs associating only with non-granule RBPs (Figure S3B, p value = 0.04, Wilcoxon rank-sum test). This observation is consistent with a picture in which RNAs share a high number of RBP interactions to promote recruitment into RNP granules. Using a high confidence threshold to select RBP partners (number of reads normalized by expression levels in the third quartile of the statistical distribution) (Armaos et al., 2017), we found that our list of RNAs overlaps with a recently published atlas of transcripts enriched in SGs (area under the receiver operating characteristic [ROC] curve [AUC]

of 0.89; sensibility of 81.3% and specificity of 85.2%; Figure S3C; Table S1K) (Khong et al., 2017).

### Non-Coding RNAs Are Contacted by Granule RBPs

Among the most contacted RNAs, we found an enrichment of small nuclear and nucleolar RNAs that are known to be associated with paraspeckles and Cajal bodies formation (Figure 1D; Table S2A; p value <  $2.2 \times 10^{-16}$ , Wilcoxon rank-sum test). We also identified a few highly contacted long non-coding RNAs,

### Granule RBPs Share RNA Networks

In both yeast and human proteomes, we found that granule-forming RBPs share a larger number of transcripts (Figure S3A; Tables S1G–S1J; yeast p value <  $2.2 \times 10^{-16}$ , K562 p value <  $2.2 \times 10^{-16}$ , KS test). Independent of their length, RNAs contacting granule RBPs preferentially interact with other granule RBPs (Figure 1D, p value <  $2.2 \times 10^{-16}$ , Wilcoxon rank-sum test). In agreement with this finding, RNAs interacting exclusively with granule RBPs have a higher number of

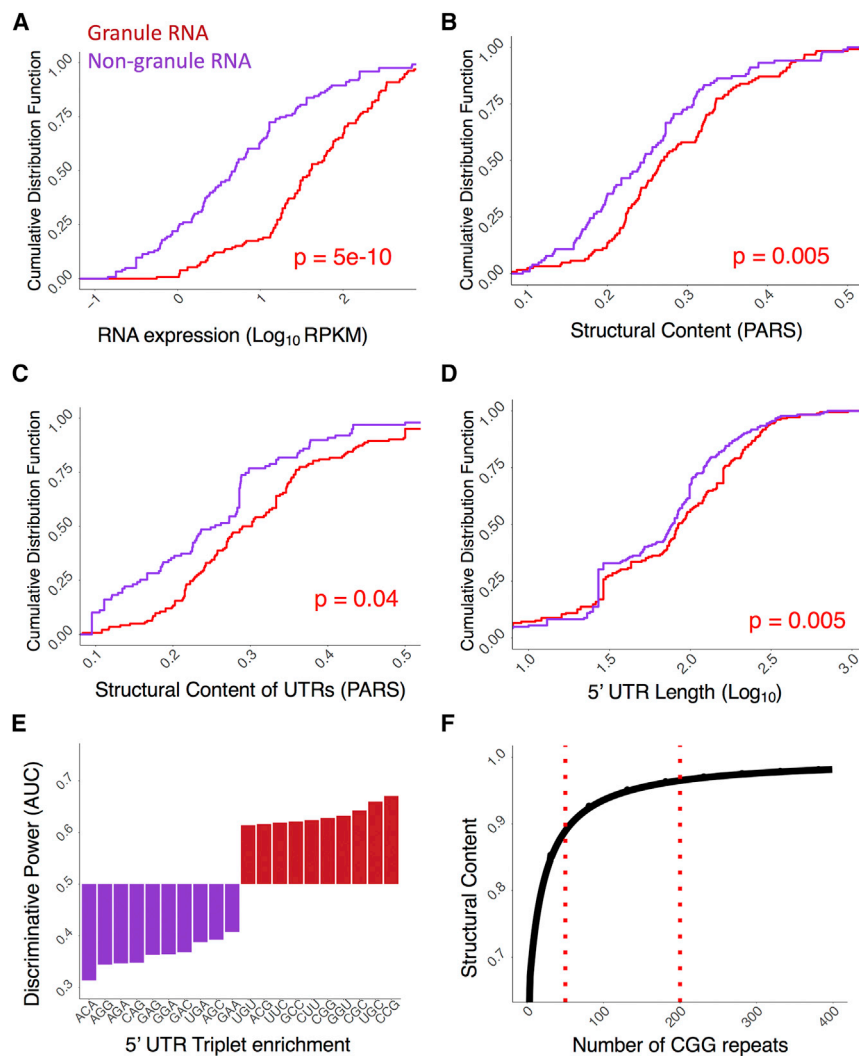

**Figure 2. Properties of Scaffolding RNAs**

(A–D) Properties of RNAs contacted by granule-proteins. Granule transcripts are more abundant (A, p value =  $4.65 \times 10^{-11}$ , KS test), and structured (B, p value = 0.005; C, p value = 0.04; KS test) with longer UTRs (D, p value 5'UTR = 0.005, KS test) than non-granule RNAs.

(E) Occurrence of CCG, UGC, CGC, GGU, and CGG repeats discriminates the 5' UTRs of granule and non-granule transcripts (the area under the ROC curve, AUC, is used to separate the two groups).

(F) Increasing the length of CGG repeats results in stronger secondary structural content (the CROSS algorithm [Delli Ponti et al., 2017] is used to measure the amount of double-stranded RNA).

pressed (Figure 2A; p value =  $5 \times 10^{-11}$ , Kolmogorov-Smirnov, KS test), structured in UTRs (Figures 2B, and 2C; parallel analysis of RNA structure [PARS] data; p values = 0.005 and 0.05; we note that the signal is enriched at the 3' UTRs with p value < 0.001; the 5' UTRs is associated with a p value of 0.02; KS test; STAR Methods), and have longer UTRs (Figure 2D; 5'UTR is shown; p value = 0.005, KS test; 3' UTR is reported in Figure S3D). This result, also valid in yeast (Figures S3E and S3F; Tables S2B and S2C), is consistent with previous observations that length (Zhang et al., 2015), structure (Reineke et al., 2015), and abundance (Jain and Vale, 2017) contribute to RNA assembly into RNP granules (Khong et al., 2017).

Triplets prone to assemble into hairpin-like structures (Krzyszosiak et al., 2012), including CCG, UGC, CGC, GGU, and CGG, discriminate granule and non-granule transcripts in the 5' UTRs (AUCs, >0.60; Figure 2E). In agreement with these findings, predictions of RNA structure performed with the Computational Recognition of Secondary Structure (CROSS) algorithm (Delli Ponti et al., 2017) indicate that the structural content (presence of double-stranded regions) is enriched in granule-associated transcripts (Figure S4A) and increase proportionally to CGG repeat length (Figure 2F), which is in line with UV-monitored structure melting experiments (Krzyszosiak et al., 2012).

### In Silico Predictions Indicate a Large Number of Partners for FMR1 Scaffolding RNA

To further investigate the scaffolding ability of homo-nucleotide expansions, we selected the *FMR1* transcript that contains CGG repetitions. Using *catRAPID omics* (STAR Methods) (Agostini et al., 2013), we computed interactions between the 5' *FMR1* UTR (containing 79 CGG repeats) and a library of nucleic-acid binding proteins (3,340 DNA-binding, RNA-binding, and structurally disordered proteins) (Livi et al., 2015). Previously identified

such as *NEAT1*, that interacts with all the proteins present in our dataset (Figure 1D). In agreement with this finding, *NEAT1* has been described as an architectural RNA (West et al., 2016) implicated in scaffolding RBPs (Maharana et al., 2018) for paraspeckle nucleation. We hypothesize that other highly contacted long non-coding RNAs may have similar functions within cytoplasmic RNP granules. For instance, *NORAD*, a recently described long non-coding RNA involved in genomic stability, interacts with the large majority of proteins in our dataset (Lee et al., 2016). *NORAD* has repetitive sequence regions, is activated upon stress, has ability to recruit proteins (Tichon et al., 2016), and aggregates in SGs (Khong et al., 2017).

### Characteristic Features of Candidate Scaffolding RNAs

We next studied which properties support the scaffolding activity of RNAs within granules. In this analysis, we define as granule transcripts those contacted by a larger number of granule-forming RBPs than non-granule forming RBPs (vice versa for non-granule transcripts; STAR Methods; Table S2B and S2C), we found that RNAs enriched in granule RBP contacts are more ex-

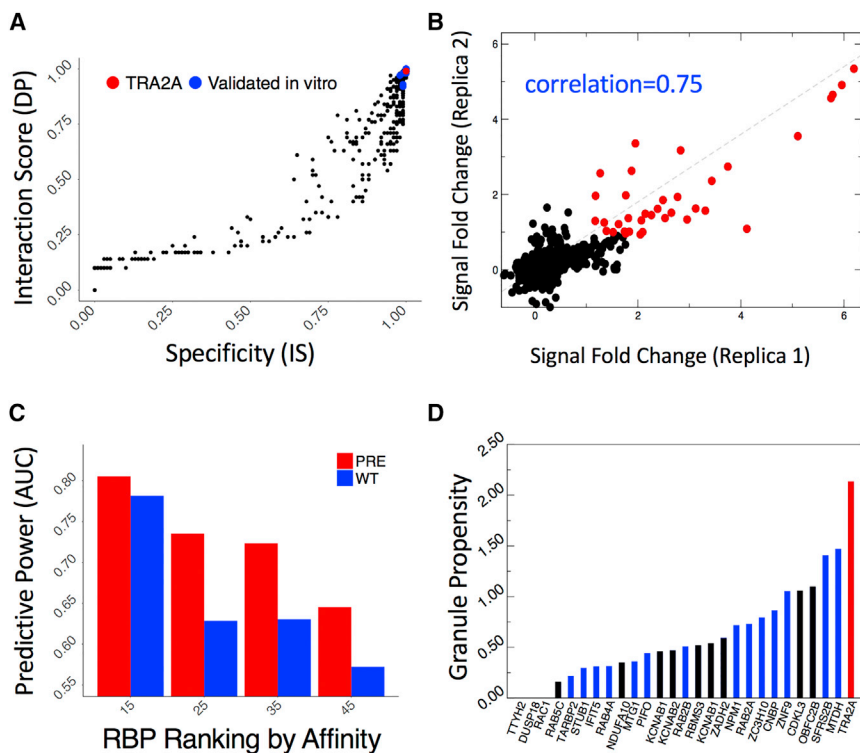

**Figure 3. Protein Interactions of CGG Repeats**

(A) Using *catRAPID omics* (Agostini et al., 2013), we computed protein interactions with the first *FMR1* exon (containing 79 CGG repeats). Previously identified partners, such as HNRNP A1, A2/B1, A3, C, D, and M; SRSF 1, 4, 5, 6, 7, and 10; as well as MML1 and KHDRBS3 show strong binding propensities and specificities (blue dots) (Sellier et al., 2010). A previously unknown interactor, TRA2A (red dot), shows comparable binding propensities.

(B) We validated RBP interactions with *FMR1* exon (“pre”containing 79 CGG repeats) through protein arrays (Cirillo et al., 2017; Marchese et al., 2017). We obtained high reproducibility between replicas (Pearson’s correlations > 0.75 in log scale) and identified strong-affinity interactions (signal to background ratio > 2.5; red dots). The same procedure was applied to the *FMR1* exon containing 21 CGG repeats (Table S4).

(C) We measured *catRAPID omics* (Agostini et al., 2013) performances on protein array data selecting an equal number of strong- (highest signal to background ratios) and poor-affinity (lowest signal to background ratios) candidates.

(D) Out of 27 candidates binding to both 79 and 21 CGG repeats (signal to background ratio > 2.5), 15 are highly prone to form granules (blue bars) (Bolognesi et al., 2016), and the splicing

regulator TRA2A (red bar) shows the highest propensity. The black bars indicate non-specific partners interacting also with SNCA 3’ UTR (Cirillo et al., 2017; Marchese et al., 2017) or showing poor RNA-binding propensity (Livi et al., 2015).

CGG-binding proteins (Sellier et al., 2010), such as HNRNP A1, A2/B1, A3, C, D, and M, and SRSF 1, 4, 5, 6, 7, and 10, as well as MBNL1 and KHDRBS3, were predicted to interact strongly (discriminative power, >0.90) and specifically (interaction strength, >0.90; Figure 3A; Table S3; empirical p values < 0.01). Similar binding propensities were also found for a set of 92 RBPs reported to assemble in SGs (Jain et al., 2016) (Table S3). In addition, our calculations identify a group of 37 RBPs that are predicted to form granules by the *catGRANULE* algorithm (Bolognesi et al., 2016) (STAR Methods; Figures S4B and S4C). Among the RBPs prone to associate with *FMR1*, we found a class of splicing factors, including TRA2A (interaction score, 0.99; specificity, 1.00; Table S3).

### High-Throughput Validation of CGG Partners and Identification of TRA2A Interaction

We used protein arrays (Cirillo et al., 2017; Marchese et al., 2017) to perform a large *in vitro* screening of RBP interactions with the first *FMR1* exon (STAR Methods). We probed both expanded (79 CGG) and normal (21 CGG) range repeats on independent replicas, obtaining highly reproducible results (Pearson’s correlations, >0.75 in log scale; Figure 3B; Table S4). We used the 3’ UTR of a similar length transcript, *SNCA* (575 nucleotides), to control for the specificity of RBP interactions (Marchese et al., 2017).

Using fluorescence intensities (signal to background ratio) to measure binding affinities, we found that previously identified partners SRSF 1, 5, and 6 rank in the top 1% of all interactions

(out of 8,900 proteins), followed by KHDRBS3 (2%) and MBNL1 (5%). We observed strong intensities (signal to background ratio, >1.5 corresponding to top 1% of all interactions) for 85 RBPs interacting with expanded repeats (60 RBPs for normal-range repeats) and using more stringent cutoff (signal to background ratio, >2.5 for top 1% of all interactions) we identified 27 previously unreported interactions (binding to both expanded and normal range repeats).

The list of 85 RBPs showed enrichment in Gene Ontology (GO) terms related to splicing activity (FDR, <10<sup>-7</sup>), as reported by *cleverGO* (Klus et al., 2015) as well as GeneMANIA server (<https://genemania.org/>) and includes SRSF 1, 5, 6, and 10; PCBP 1 and 2; HNRNP A0 and F; NOVA1; PPIG; and TRA2A. *catRAPID omics* predictions are in agreement with protein array experiments: from low- to high-affinity interactions, *catRAPID* performances increase, reaching AUCs of 0.80 (Figure 3C), indicating a strong predictive power. Notably, although KHDRBS1 (not present in the protein array) is predicted to have poor binding propensity to CGG repeats, two of its RBP partners, CIRBP and PTBP2, rank in the top 1% of all fluorescence intensities, as predicted by *catRAPID* (Cirillo et al., 2013), and DGCR8, which interacts with KHDRBS1 through DROSHA (Sellier et al., 2013), is found to interact (top 7% of all fluorescence intensities).

Out of 27 high-confidence candidates, 24 were predicted by *catGRANULE* (Bolognesi et al., 2016) to form granules, and among them, the splicing regulator TRA2A showed the highest score (granule propensity, 2.15; Figure 3D; Figure S4D;

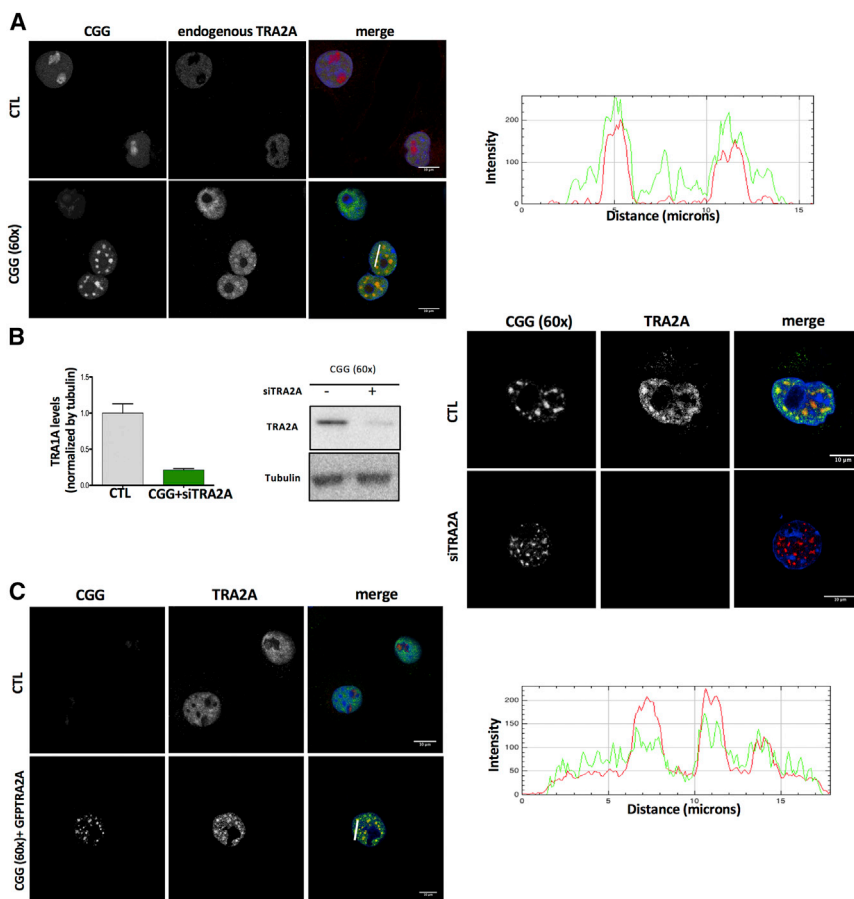

**Figure 4. Endogenous TRA2A Is Recruited in Nuclear RNA Inclusions upon CGG Over-expression**

This specific recruitment is validated by experiments with TRA2A overexpression and TRA2A knockdown.

(A) COS-7 cells were transfected with either CGG (60x) or the empty vector as control. After 24 hr of transfection, cells were immunostained with primary antiTRA2A antibody and secondary 488 and hybridized with a Cy3-GGC (8x) probe for RNA FISH. The graph represents the 488 Cy3 intensity co-localization in the section from the white line.

(B) After 24 hr of transfection, cells were immunostained with antiTRA2A antibody and hybridized with a Cy3-GGC (8x) probe for RNA FISH; relative TRA2A protein levels in COS-7 cells were treated as in (B) ( $p < 0.028$ , unpaired t test).

(C) COS-7 cells were transfected with empty vector or CGG (60x) and GFP-TRA2A. After 48h, cells were hybridized with Cy3-GGC (8x) probe for RNA FISH. The graph represents the GFP/Cy3 intensities co-localization in the section from the white line.

Yet, nuclear inclusions do not form in B lymphocytes and we used the COS-7 cellular model to study *FMR1* inclusions (Sellier et al., 2010). We observed that transfection of a plasmid containing CGG expansions (triplet repeated 60 times) induces significant increases in RNA and protein levels of TRA2A after 48 hours (Figure S5) (Sellier et al., 2010). By means

Table S3). In agreement with our predictions, eCLIP experiments indicate that the *FMR1* transcript ranks in the top 25% of strongest interactions with TRA2A (Van Nostrand et al., 2016).

### TRA2A Recruitment in *FMR1* Inclusions Is Driven by CGG Hairpins In Vivo

As splicing defects have been reported to occur in FXTAS disease (Botta-Orfila et al., 2016; Sellier et al., 2010), we decided to further investigate the recruitment of the splicing regulator TRA2A. B lymphocytes are often used for initial investigations because of their easy accessibility from blood samples from patients. Expansions of CGG from 55 to 200 CGG repeats result in mRNA levels in B lymphocytes that can exceed by 2–10 fold (Tassone et al., 2007). Therefore, B lymphocytes are considered a good model to recapitulate some of the events occurring due to the permutation (i.e., higher expression levels of *FMR1*), and to explore new biomarkers. We measured RNA and protein levels of TRA2A in B lymphocytes of a normal individual (41 CGG repeats; Coriell repository number NA20244A) and a FXTAS premutation carrier (90 CGG repeats; Coriell repository number GM06906B). RNA and protein levels of TRA2A were found significantly increased 2.9 and 1.4 times in the FXTAS premutation carrier compared with a normal individual, which indicates that the TRA2A is significantly altered in disease (Figure S5).

of RNA fluorescence in situ hybridization (FISH) coupled to immunofluorescence (STAR Methods), we found that CGG expansions and endogenous TRA2A significantly co-localize in nuclear inclusions (45 out of 50 screened cells showed unambiguous match). By contrast, TRA2A shows a diffuse nuclear pattern in cells that do not overexpress CGG repeats (Figure 4A).

Upon knockdown of TRA2A using small interfering RNA (siRNA) (STAR Methods), we observed that the nuclear aggregates still form (Figures 4B), whereas overexpression of TRA2A attached to GFP (GFP-TRA2A) results in strong recruitment in CGG inclusions (Figure 4C; the control GFP plasmid and GFP-TRA2A in the absence of CGG repeats does not give a granular pattern).

To further characterize the recruitment of TRA2A in CGG repeats, we treated COS-7 cells with two different chemicals. By incubating COS-7 cells with 9-hydroxy-5,11-dimethyl-2-(2-(piperidin-1-yl)ethyl)-6H-pyrido[4,3-b]carbazol-2-ium (also named 1a) that binds to CGG repeats preventing interactions with RBPs (Disney et al., 2012), TRA2A recruitment was blocked (Figure 5A). Using TmPyP4 to specifically unfold CGG repeats (Morris et al., 2012), we found that the aggregates are disrupted and TRA2A remains diffuse (Figure 5B).

Our experiments show that the aggregation of TRA2A is caused by CGG repeats and tightly depends on the hairpin structure.

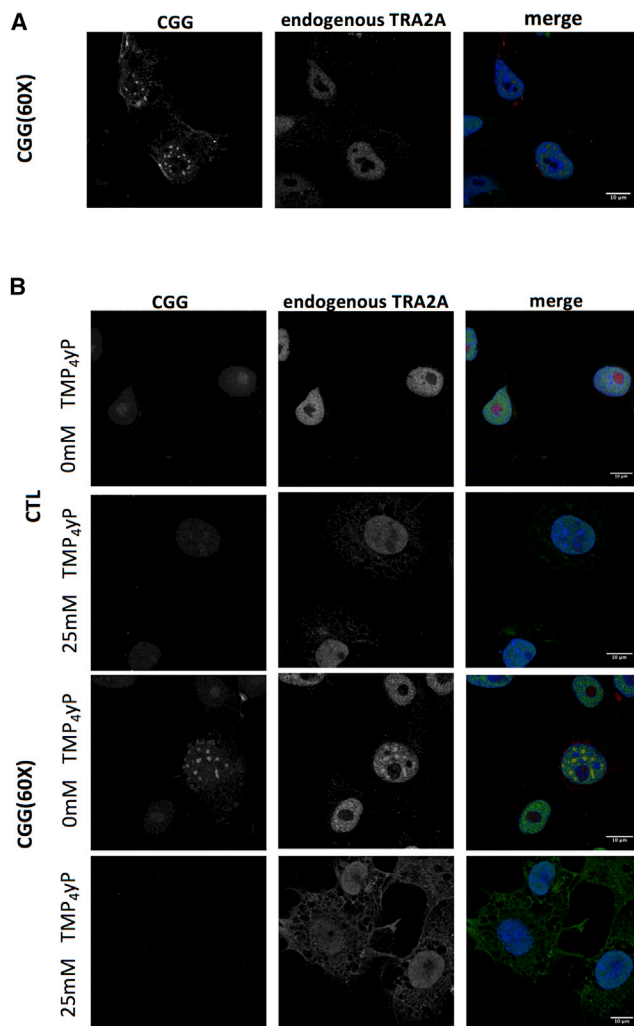

**Figure 5. Disrupting CGG Hairpins and Dissolving RNA Inclusions Impair TRA2A Sequestration**

(A) COS-7 cells were co-transfected with empty vector or CGG (60x), and after 24 hr of transfection, cells were treated with *1a* to block protein binding. (B) COS-7 cells were treated similarly as in (A) but with the TmPyP4 molecule instead of *1a* to disrupt CGG structure. In both cases, cells were immunostained with primary anti-TRA2A antibody and hybridized with the Cy3-GGC (8x) probe for RNA FISH.

### TRA2A Recruitment in RNA Inclusions Is Independent of its Partner TRA2B

Using RNA FISH coupled to immunofluorescence, we found that TRA2B, which interacts with TRA2A (Huttlin et al., 2015) and binds to CGG repeats (Sellier et al., 2010), aggregates in COS-7 cells transfected with CGG repeats (x60; Figure 6A). Notably, endogenous TRA2B is recruited by CGG inclusions upon TRA2A knock down (Figure 6B, upper row; Figure 6C; the result is also observed when TRA2B is overexpressed; Figures S6A and 6B). Similarly, endogenous TRA2A co-localizes with CGG repeats upon TRA2B knock down (Figure 6B, lower row; see also Figures S6C–S6E). Thus, upon knock down of one of the two proteins, the other one is still recruited by the over-

expressed CGG repeats (Figure 6B; Figures S6F and S6G). By contrast, in absence of CGG overexpression, neither TRA2A nor TRA2B localize within the inclusions (Figures S6A–S6E).

### Alterations in RNA Splicing by *FMR1* Inclusions Correlate with Alterations in RNA Splicing by TRA2A Knockdown

When assessing TRA2A levels in response to CGG overexpression in COS-7 cells, we found that around 20%–25% of TRA2A is recruited in condensates that are positive for CGG FISH signal (STAR Methods), which is fully compatible with SOD1 accumulation in SGs (Mateju et al., 2017). To study the functional implications of TRA2A recruitment in *FMR1* inclusions, we analyzed changes in RNA splicing (STAR Methods).

Splicing alterations due to TRA2A sequestration were investigated through microarrays and RNA sequencing (RNA-seq) experiments (both in triplicate experiments) to identify events (1) occurring upon CGG aggregate formation (CGG<sup>+</sup> TRA2A<sup>+</sup>; 74 instances) and (2) altered when TRA2A is knocked down (CGG<sup>+</sup> TRA2A<sup>-</sup>, 82 instances). With respect to events occurring in the absence of CGG aggregates (CGG<sup>-</sup> TRA2A<sup>+</sup>, i.e., physiological conditions), 59 exons are spliced in CGG<sup>+</sup> TRA2A<sup>+</sup> and not in CGG<sup>+</sup> TRA2A<sup>-</sup> (CGG<sup>+</sup> TRA2A<sup>+</sup> \ CGG<sup>+</sup> TRA2A<sup>-</sup>) and thus depend on TRA2A sequestration (39 skipped and 20 included exons; q-value, <0.10; Figure 7A; Table S5). Notably, 67 events occur exclusively in CGG<sup>+</sup> TRA2A<sup>-</sup> and can be ascribed to perturbations in the splicing factor network (Tan and Fraser, 2017), while 15 (i.e., 3+12) occur in both CGG<sup>+</sup> TRA2A<sup>+</sup> and CGG<sup>+</sup> TRA2A<sup>-</sup> (Figure 7B) and are, therefore, TRA2A independent (Figure 7B).

To better understand TRA2A-dependent effects, we studied events caused by TRA2A depletion in the absence of CGG aggregates (CGG<sup>-</sup> TRA2A<sup>-</sup>; Figure 7A): 11 out of 59 CGG<sup>+</sup> TRA2A<sup>+</sup> cases are present in CGG<sup>-</sup> TRA2A<sup>-</sup> but not in CGG<sup>+</sup> TRA2A<sup>-</sup> (CGG<sup>-</sup> TRA2A<sup>-</sup> ∩ CGG<sup>+</sup> TRA2A<sup>+</sup> \ CGG<sup>+</sup> TRA2A<sup>-</sup>), which is statistically highly significant. Indeed, by shuffling the splicing events reported in one of the two experiments (i.e., randomizing the association between exons and q-values), we found that the intersection CGG<sup>-</sup> TRA2A<sup>-</sup> ∩ CGG<sup>+</sup> TRA2A<sup>+</sup> \ CGG<sup>+</sup> TRA2A<sup>-</sup>, never contains 11 events (we found 1 event in 288 out 10,000 randomizations and 2 events in 3 out 10,000 randomizations, but never > 3 events; p value < 10<sup>-4</sup>; Figure 7B). Notably, 17 cases occur in CGG<sup>+</sup> TRA2A<sup>-</sup> and CGG<sup>-</sup> TRA2A<sup>-</sup> but not in CGG<sup>+</sup> TRA2A<sup>+</sup>, which is expected because splicing factors work together on common targets (Tan and Fraser, 2017).

Using the *cleverGO* algorithm (Klus et al., 2015), we found that the largest GO cluster of affected genes includes RBPs (18 genes; Table S5; “RNA-binding”; fold enrichment of 24; p value < 10<sup>-8</sup>; calculated with Bonferroni correction; examples: HNRNPL, CIRBP, and DDX24) and, more specifically, spliceosome components (“mRNA splicing via spliceosome”; fold enrichment of 5; p value < 10<sup>-3</sup>, examples: HNRNP A2/B1, and SRSF 10) or genes related to alternative splicing activity (“regulation of splicing”; fold enrichment of 6; p value < 10<sup>-3</sup>, examples: RBM5 and THOC1).

Intriguingly, genes associated with mental retardation, such as UBE2A (Budny et al., 2010), ACTB (Procaccio et al., 2006), and ACTG1 (Rivière et al., 2012), have splicing patterns affected by TRA2A sequestration. Similarly, muscle-related proteins,



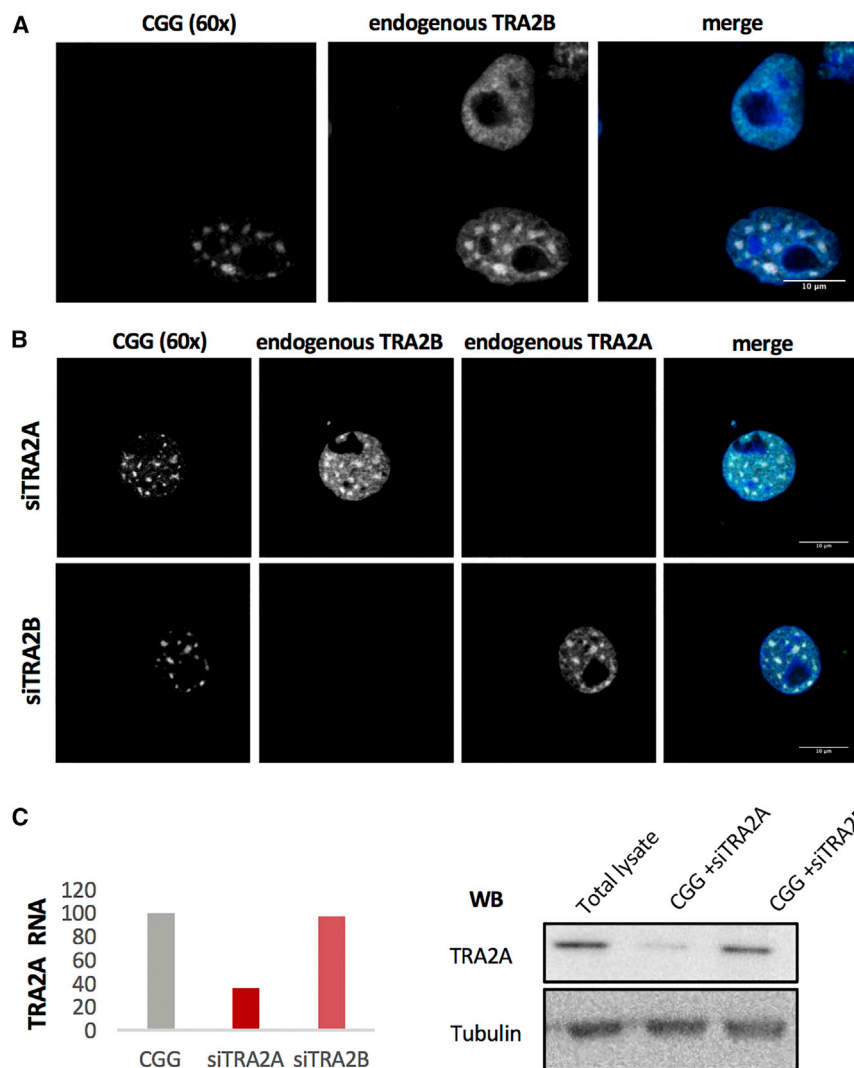

**Figure 6. Endogenous TRA2B Is Recruited in CGG Inclusions but TRA2A Recruitment Is Independent from TRA2B**

(A) COS-7 cells were transfected with CGG (60x). After 24 hr of transfection, cells were immunostained with antiTRA2B antibody and hybridized with a Cy3-GGC (8x) probe for RNA FISH. (B) COS-7 cells were transfected with CGG (60x) and siTRA2A or siTRA2B. After 24 hr of transfection, cells were immunostained with antiTRA2 antibodies and hybridized with a Cy3-GGC probe for RNA FISH. (C) TRA2A protein levels in COS-7 cells were treated as described in (B).

### TRA2A Is Present in Murine and Human FXTAS Brain Inclusions

We tested if TRA2A co-aggregates with *FMR1* inclusions in two mouse models with repeats containing more than 90 CGG: (1) the 5' UTR was expressed under the control of doxycycline (Hukema et al., 2015) and (2) the CGG repeat has been replaced by the human expanded repeat (Willemssen et al., 2003). Immunohistochemistry experiments with sections of paraffin-embedded neurons and astrocytes indicated that the TRA2A protein is present in the inclusions (Figure 7C; STAR Methods).

Importantly, RAN translation has been shown to occur in *FMR1* 5' UTR, resulting in the production of FMRpolyG and FMRpolyA peptides (Todd et al., 2013). The main RAN translation product, FMRpolyG, co-localizes with ubiquitin in intranuclear inclusions (Sellier et al., 2017).

In agreement with our murine model, we found positive staining for TRA2A in

including PIP5K1A (Chen et al., 2018) and TPM1 (Erdmann et al., 2003), and genes linked to intellectual disabilities, such as DOCK3 (de Silva et al., 2003), and craniofacial development, such as WWP2 (Zou et al., 2011), are subjected to exon skipping upon TRA2A recruitments in RNP condensates (Table S5; Figure 7B). Out of 59 splicing events occurring in CGG<sup>+</sup> TRA2A<sup>+</sup> and CGG<sup>+</sup> TRA2A<sup>-</sup> conditions, 23 (including ACTG1, TMP1, and WWP2) involve transcripts that physically bind to FMRP protein, as also detected in CLIP experiments (available from <http://starbase.sysu.edu.cn/>), which unveils an important link (significance: p value < 10<sup>-4</sup>; Fisher's exact test) to fragile X syndrome (Maurin et al., 2014).

In the 11 CGG<sup>+</sup> TRA2A<sup>-</sup> cases present in CGG<sup>-</sup> TRA2A<sup>-</sup> but not in CGG<sup>+</sup> TRA2A<sup>+</sup> (Figure 7B) there is GADD45B linked to synaptic plasticity (Ma et al., 2009), as well as g KIAA1217 (Semba et al., 2006) and TM4SF19 (de la Rica et al., 2013) associated with skeletal development pathways. We also found the molecular chaperone CCT that is known to restrict neuro-pathogenic protein aggregation via autophagy (Pavel et al., 2016).

nuclear inclusions from two FXTAS post-mortem human brain donors (Figure 7D), and remarkably, we observed co-localization with FMRpolyG (Figure 7E). We observe that FMRpolyG reaches its highest abundance in hippocampus co-aggregating in 20% total nuclei (Glineburg et al., 2018). In the same tissue, TRA2A co-localizes with inclusions in 2%–3% of total nuclei, thus indicating strong sequestration (Figure S7). Interestingly, TRA2A-positive cells aggregate in groups that are in close proximity, which provides precious information on the biochemical behavior of aggregates as well as the spreading nature of the disease across brain districts (Figure S7).

Thus, TRA2A sequestration by CGG repeats is not only observed in cell lines but also in FXTAS animal models and human post-mortem brain samples.

### DISCUSSION

Previous evidence indicates that proteins are the main cohesive elements within RNP granules (Banani et al., 2017). Yet, specific

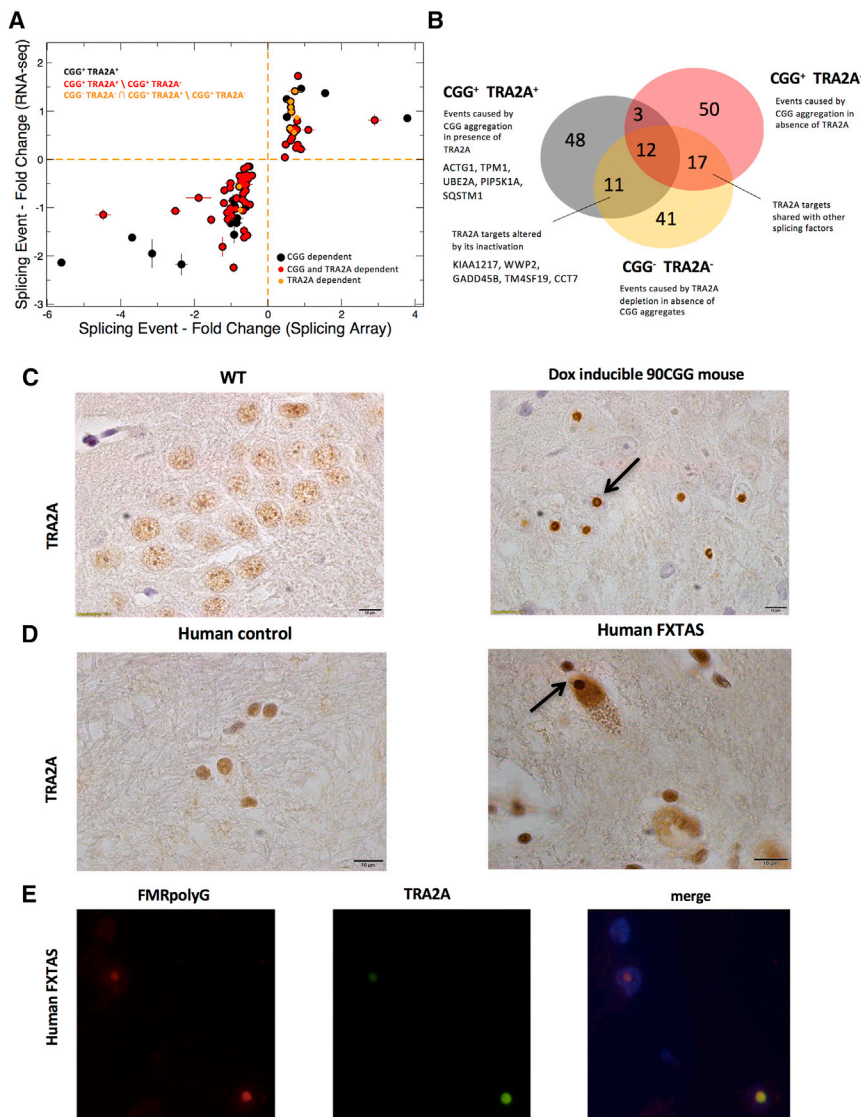

**Figure 7. TRA2A Recruitment in *FMR1* Inclusions Affects Splicing**

(A) With respect to events occurring in the absence of CGG aggregates (CGG<sup>-</sup> TRA2A<sup>-</sup>), 59 exons are spliced in CGG<sup>+</sup> TRA2A<sup>+</sup> and not in CGG<sup>+</sup> TRA2A<sup>-</sup> (i.e., CGG<sup>+</sup> TRA2A<sup>+</sup> \ CGG<sup>+</sup> TRA2A<sup>-</sup>; red points). We investigated cases caused by TRA2A depletion in absence of CGG aggregates (CGG<sup>-</sup> TRA2A<sup>-</sup>) and identified 11 events that are present in CGG<sup>+</sup> TRA2A<sup>-</sup> and not in CGG<sup>+</sup> TRA2A<sup>+</sup> (i.e.: CGG<sup>-</sup> TRA2A<sup>-</sup> ∩ CGG<sup>+</sup> TRA2A<sup>+</sup> \ CGG<sup>+</sup> TRA2A<sup>-</sup>; orange points; Table S5; STAR Methods).

(B) Muscle proteins, including PIP5K1A, TPM1, and autophagy-related SQSTM1, are subjected to exon skipping upon TRA2A recruitments in RNP condensates (Table S5; Figure 7B). Events occurring when TRA2A is depleted are linked to neuro-pathogenesis (GADD45B and CCT7) and skeletal development (KIAA1217 and TM4SF19).

(C) TRA2A immunohistochemistry in wild-type (WT) and premutated mouse model (counterstaining was done with hematoxylin; the arrow points to the inclusion).

(D) TRA2A immunohistochemistry in human hippocampus from control and FXTAS (counterstained with hematoxylin; the arrow points to the inclusion).

(E) Double immunofluorescence of TRA2A as well as FMRpolyG peptides in human FXTAS (STAR Methods).

RNAs can act as structural scaffolds to assemble proteins in RNP condensates, as recently reported in the literature (Langdon et al., 2018), and RNA-RNA interactions play an important role in the formation of RNP assemblies (Van Treeck and Parker, 2018). Our analysis of PRI networks reveals that scaffolding RNAs have a large number of RBP contacts, increased length, and high structural content. In agreement with our computational analysis, two works published at the time of writing indicate that UTR length and structural content (Khong et al., 2017; Maharana et al., 2018) are important properties of RNAs aggregating in RNP condensates. Moreover, nucleotide repeats (Jain and Vale, 2017), changes in RNA levels (Tartaglia and Vendruscolo, 2009), and RNA binding abilities (Zhang et al., 2015) are known factors modulating phase transitions in the cell.

Our PRI networks were retrieved from eCLIP experiments (Van Nostrand et al., 2016) that have been performed in conditions different from those promoting the formation of physiological SGs. Similarly, PPI networks were taken from

the BioPlex database that includes highly curated, multi-source experiments (Huttlin et al., 2015). Yet, our underlying hypothesis is that PPI and PRI are governed by physico-chemical forces that are in place regardless of the environmental conditions, and we assume that the ability of proteins and RNAs to assemble is impaired when the molecules are poorly expressed or chemically modified. Indeed, to control for the contribution of RNA abundance, we used it to

normalize the number of CLIP reads in our calculations. Supporting our assumptions, the RNA list retrieved from the network analysis shows a very significant overlap with a recently published atlas of transcripts enriched in SGs (Khong et al., 2017). We note that our analysis would be more accurate if the protein and RNA interaction networks were known for the different biological condensates.

Combining computational approaches with large-scale *in vitro* experiments, we unveiled the scaffolding ability of *FMR1* 5' UTR, recovering previously known partners relevant in FXTAS, such as SRSF1, 5, and 6; KHDRBS3; and MBNL1 (Sellier et al., 2010), and identifying additional interactions involved in alternative splicing, such as PCBP 1 and 2, HNRNP A0 and F, NOVA1, PPIG, and TRA2A. At the time of writing, TRA2A has been reported to be a component of ALS granules (Markmiller et al., 2018). Yet, TRA2A does not appear in TAU inclusions (Maziuk et al., 2018), which indicates that its sequestration occurs only in specific neurodegenerative diseases.

To prove the implication of TRA2A sequestration in FXTAS pathogenesis and overcome the technical limitation of our cellular model in which the non-AUG codon downstream the 5' UTR of *FMR1* is lacking, we tested TRA2A colocalization with FMRpolyG in patients' brain samples. Our experiments showed that the two proteins colocalize, providing additional information on TRA2A involvement in FXTAS disease. This result indicates that CGG could interact with both TRA2A and FMRpolyG and supports our previous work indicating that interactions between proteins and cognate RNAs are frequent in aggregation-prone genes (Cirillo et al., 2013).

Through splicing microarrays and RNA-seq analysis, we found that TRA2A sequestration induces changes in the splicing of genes associated with mental retardation, including ACTB (Procaccio et al., 2006) and ACTG1 (Rivière et al., 2012), intellectual disabilities, such as DOCK3 (de Silva et al., 2003), and craniofacial development, such as WWP2 (Zou et al., 2011), which are relevant in the context of fragile X syndrome (Maurin et al., 2014). Thus, the identification of TRA2A opens the avenue for new therapeutic intervention to correct the splicing defects of deregulated transcripts or to restore the functional role by clustered regularly interspaced short palindromic repeat (CRISPR)-Cas technology.

In the future, it will be very important to analyze genome-wide data in different bio-specimens from patients to see the expression of differently spliced variants of TRA2A targets. Nevertheless, because FXTAS is a rare disease with low penetrance, the number of samples from patients is very limited. Therefore, more work should be done in this direction to promote biomarker discovery in patients and, ultimately, promote personalized treatment. Yet, our theoretical framework is also applicable to other diseases in which RNAs promote the formation of phase-separated condensates that could be used by the pathologist to identify the proteins that are specifically sequestered.

## STAR★METHODS

Detailed methods are provided in the online version of this paper and include the following:

- **KEY RESOURCES TABLE**
- **CONTACT FOR REAGENT AND RESOURCE SHARING**
- **EXPERIMENTAL MODEL AND SUBJECT DETAILS**
  - Human lymphocytes
  - COS-7 cells
  - Mouse model
  - Human post-mortem samples
- **METHOD DETAILS**
  - RNA IVT and Protein arrays
  - IF-RNA FISH in COS-7 cells
  - q-PCR
  - Western Blot
  - Immunohistochemistry and immunofluorescence from murine and human brain tissue
  - Quantification of TRA2A levels in presence of CGG aggregates
- **QUANTIFICATION AND STATISTICAL ANALYSIS**

- Data acquisition and composition
- Network analysis
- RNA properties analysis
- RNA secondary structure
- Statistical analysis
- **DATA AND SOFTWARE AVAILABILITY**
  - catRAPID omics analysis
  - catGRANULE analysis
  - Splicing Arrays experiments and analysis
  - RNA-seq experiments and analysis

## SUPPLEMENTAL INFORMATION

Supplemental Information includes seven figures and five tables and can be found with this article online at <https://doi.org/10.1016/j.celrep.2018.11.076>.

## ACKNOWLEDGMENTS

The authors are deeply in debt to the brain donors and their relatives. We acknowledge specimen donations from Dr. Nicolas Charlet-Berguerand (pcDNA3 CGG 60X), Dr. David Elliott and Dr. Caroline Dalgliesh (plasmid GFP TRA2A), Dr. Eulàlia Martí (plasmids CGG 21X and 79X), and Dr. Matthew D. Disney (molecule 1a). We thank Martin Vabulas for the “schemino” of Figure 1A and all members of Tartaglia's lab, especially Dr. Elias Bechara, for the interpretation of splicing experiments, Laura Padovani and Andrea Vandelli for the computational analyses. We are grateful to Lara Nonell Mazelón and Magdalena Amal Segura for RNA-seq and splicing arrays analysis, and Dr. Fatima Gebauer, Dr. Natàlia Sánchez de Groot, Dr. Davide Cirillo, and Dr. Domenica Marchese for stimulating discussions. The research leading to these results has been supported by the European Research Council (RIBOMYLOME\_309545), Spanish Ministry of Economy and Competitiveness (BFU2014-55054-P and BFU2017-86970-P), and “Fundació La Marató de TV3” (P1043296). We acknowledge support of the Spanish Ministry of Economy and Competitiveness, ‘Centro de Excelencia Severo Ochoa 2013-2017’. We acknowledge the support of the CERCA Programme, Generalitat de Catalunya and Spanish Ministry for Science and Competitiveness (MINECO) to the EMBL partnership.

## AUTHOR CONTRIBUTIONS

G.G.T. and T.B.-O. conceived the study together with the help of B.B.; F.C.-S. performed the calculations; T.B.-O. supervised M.G.-B. and performed all the experiments as well as analyzed samples from R.K.H., L.-A.W.S., and E.G.; T.B.-O., N.L.-G., G.G.T., and B.L. analyzed the data; T.B.-O., F.C.-S., B.B., and G.G.T. wrote the manuscript.

## DECLARATION OF INTERESTS

The authors declare no conflict of interest.

Received: June 19, 2018

Revised: September 26, 2018

Accepted: November 19, 2018

Published: December 18, 2018

## REFERENCES

- Agostini, F., Zanzoni, A., Klus, P., Marchese, D., Cirillo, D., and Tartaglia, G.G. (2013). catRAPID omics: a web server for large-scale prediction of protein-RNA interactions. *Bioinformatics* 29, 2928–2930.
- Armaos, A., Cirillo, D., and Gaetano Tartaglia, G. (2017). omiXcore: a web server for prediction of protein interactions with large RNA. *Bioinformatics* 33, 3104–3106.
- Banani, S.F., Lee, H.O., Hyman, A.A., and Rosen, M.K. (2017). Biomolecular condensates: organizers of cellular biochemistry. *Nat. Rev. Mol. Cell Biol.* 18, 285–298.

- Bellucci, M., Agostini, F., Masin, M., and Tartaglia, G.G. (2011). Predicting protein associations with long noncoding RNAs. *Nat. Methods* 8, 444–445.
- Bolognesi, B., Lorenzo Gotor, N., Dhar, R., Cirillo, D., Baldrighi, M., Tartaglia, G.G., and Lehner, B. (2016). A concentration-dependent liquid phase separation can cause toxicity upon increased protein expression. *Cell Rep.* 16, 222–231.
- Botta-Orfila, T., Tartaglia, G.G., and Michalon, A. (2016). Molecular pathophysiology of fragile X-associated tremor/ataxia syndrome and perspectives for drug development. *Cerebellum* 15, 599–610.
- Brangwynne, C.P., Eckmann, C.R., Courson, D.S., Rybarska, A., Hoege, C., Gharakhani, J., Jülicher, F., and Hyman, A.A. (2009). Germline P granules are liquid droplets that localize by controlled dissolution/condensation. *Science* 324, 1729–1732.
- Brannan, K.W., Jin, W., Huelga, S.C., Banks, C.A.S., Gilmore, J.M., Florens, L., Washburn, M.P., Van Nostrand, E.L., Pratt, G.A., Schwinn, M.K., et al. (2016). SONAR discovers RNA-binding proteins from analysis of large-scale protein-protein interactomes. *Mol. Cell* 64, 282–293.
- Buchan, J.R., Muhrad, D., and Parker, R. (2008). P bodies promote stress granule assembly in *Saccharomyces cerevisiae*. *J. Cell Biol.* 183, 441–455.
- Budny, B., Badura-Stronka, M., Materna-Kiryluk, A., Tzschach, A., Raynaud, M., Latos-Bielenska, A., and Ropers, H.H. (2010). Novel missense mutations in the ubiquitination-related gene UBE2A cause a recognizable X-linked mental retardation syndrome. *Clin. Genet.* 77, 541–551.
- Buijssen, R.A., Sellier, C., Severijnen, L.-A.W., Oulad-Abdelghani, M., Verhagen, R.F., Berman, R.F., Charlet-Berguerand, N., Willemsen, R., and Hukema, R.K. (2014). FMRpolyG-positive inclusions in CNS and non-CNS organs of a fragile X premutation carrier with fragile X-associated tremor/ataxia syndrome. *Acta Neuropathol. Commun.* 2, 162.
- Chen, X., Wan, J., Yu, B., Diao, Y., and Zhang, W. (2018). PIP5K1 $\alpha$  promotes myogenic differentiation via AKT activation and calcium release. *Stem Cell Res. Ther.* 9, 33.
- Cirillo, D., Agostini, F., Klus, P., Marchese, D., Rodriguez, S., Bolognesi, B., and Tartaglia, G.G. (2013). Neurodegenerative diseases: quantitative predictions of protein-RNA interactions. *RNA* 19, 129–140.
- Cirillo, D., Blanco, M., Armaos, A., Buness, A., Avner, P., Guttman, M., Cerase, A., and Tartaglia, G.G. (2017). Quantitative predictions of protein interactions with long noncoding RNAs. *Nat. Methods* 14, 5–6.
- Colomer, V., Kicska, G.A., and Rindler, M.J. (1996). Secretory granule content proteins and the luminal domains of granule membrane proteins aggregate in vitro at mildly acidic pH. *J. Biol. Chem.* 271, 48–55.
- de la Rica, L., Rodríguez-Ubrea, J., García, M., Islam, A.B., Urquiza, J.M., Hernando, H., Christensen, J., Helin, K., Gómez-Vaquero, C., and Ballestar, E. (2013). PU.1 target genes undergo Tet2-coupled demethylation and DNMT3b-mediated methylation in monocyte-to-osteoclast differentiation. *Genome Biol.* 14, R99.
- de Silva, M.G., Elliott, K., Dahl, H.-H., Fitzpatrick, E., Wilcox, S., Delatycki, M., Williamson, R., Efron, D., Lynch, M., and Forrest, S. (2003). Disruption of a novel member of a sodium/hydrogen exchanger family and DOCK3 is associated with an attention deficit hyperactivity disorder-like phenotype. *J. Med. Genet.* 40, 733–740.
- Delli Ponti, R., Marti, S., Armaos, A., and Tartaglia, G.G. (2017). A high-throughput approach to profile RNA structure. *Nucleic Acids Res.* 45, e35–e35.
- Disney, M.D., Liu, B., Yang, W.-Y., Sellier, C., Tran, T., Charlet-Berguerand, N., and Childs-Disney, J.L. (2012). A small molecule that targets r(CG<sub>n</sub>G)<sub>n</sub>(exp) and improves defects in fragile X-associated tremor ataxia syndrome. *ACS Chem. Biol.* 7, 1711–1718.
- Erdmann, J., Daehmlow, S., Wischke, S., Senyuva, M., Werner, U., Raible, J., Tanis, N., Dyachenko, S., Hummel, M., Hetzer, R., and Regitz-Zagrosek, V. (2003). Mutation spectrum in a large cohort of unrelated consecutive patients with hypertrophic cardiomyopathy. *Clin. Genet.* 64, 339–349.
- Gerstberger, S., Hafner, M., and Tuschl, T. (2014). A census of human RNA-binding proteins. *Nat. Rev. Genet.* 15, 829–845.
- Glineburg, M.R., Todd, P.K., Charlet-Berguerand, N., and Sellier, C. (2018). Repeat-associated non-AUG (RAN) translation and other molecular mechanisms in fragile X tremor ataxia syndrome. *Brain Res.* 1693, 43–54.
- Grousl, T., Ungelenk, S., Miller, S., Ho, C.-T., Khokhrina, M., Mayer, M.P., Bukau, B., and Mogk, A. (2018). A prion-like domain in Hsp42 drives chaperone-facilitated aggregation of misfolded proteins. *J. Cell Biol.* 217, 1269–1285.
- Hukema, R.K., Buijssen, R.A.M., Schonewille, M., Raske, C., Severijnen, L.-A.W.F.M., Nieuwenhuizen-Bakker, I., Verhagen, R.F.M., van Dessel, L., Maas, A., Charlet-Berguerand, N., et al. (2015). Reversibility of neuropathology and motor deficits in an inducible mouse model for FXTAS. *Hum. Mol. Genet.* 24, 4948–4957.
- Huttlin, E.L., Ting, L., Bruckner, R.J., Gebreab, F., Gygi, M.P., Szpyt, J., Tam, S., Zarraga, G., Colby, G., Baltier, K., et al. (2015). The BioPlex network: a systematic exploration of the human interactome. *Cell* 162, 425–440.
- Hyman, A.A., Weber, C.A., and Jülicher, F. (2014). Liquid-liquid phase separation in biology. *Annu. Rev. Cell Dev. Biol.* 30, 39–58.
- Iwahashi, C.K., Yasui, D.H., An, H.-J., Greco, C.M., Tassone, F., Nannan, K., Babineau, B., Lebrilla, C.B., Hagerman, R.J., and Hagerman, P.J. (2006). Protein composition of the intranuclear inclusions of FXTAS. *Brain* 129, 256–271.
- Jain, A., and Vale, R.D. (2017). RNA phase transitions in repeat expansion disorders. *Nature* 546, 243–247.
- Jain, S., Wheeler, J.R., Walters, R.W., Agrawal, A., Barsic, A., and Parker, R. (2016). ATPase-modulated stress granules contain a diverse proteome and substructure. *Cell* 164, 487–498.
- Jiang, H., Wang, S., Huang, Y., He, X., Cui, H., Zhu, X., and Zheng, Y. (2015). Phase transition of spindle-associated protein regulate spindle apparatus assembly. *Cell* 163, 108–122.
- Kato, M., Han, T.W., Xie, S., Shi, K., Du, X., Wu, L.C., Mirzaei, H., Goldsmith, E.J., Longgood, J., Pei, J., et al. (2012). Cell-free formation of RNA granules: low complexity sequence domains form dynamic fibers within hydrogels. *Cell* 149, 753–767.
- Kertesz, M., Wan, Y., Mazor, E., Rinn, J.L., Nutter, R.C., Chang, H.Y., and Segal, E. (2010). Genome-wide measurement of RNA secondary structure in yeast. *Nature* 467, 103–107.
- Khong, A., Matheny, T., Jain, S., Mitchell, S.F., Wheeler, J.R., and Parker, R. (2017). The stress granule transcriptome reveals principles of mRNA accumulation in stress granules. *Mol. Cell* 68, 808–820.e5.
- Klus, P., Ponti, R.D., Livi, C.M., and Tartaglia, G.G. (2015). Protein aggregation, structural disorder and RNA-binding ability: a new approach for physico-chemical and gene ontology classification of multiple datasets. *BMC Genomics* 16, 1071.
- Krzyzosiak, W.J., Sobczak, K., Wojciechowska, M., Fiszer, A., Mykowska, A., and Kozłowski, P. (2012). Triplet repeat RNA structure and its role as pathogenic agent and therapeutic target. *Nucleic Acids Res.* 40, 11–26.
- Langdon, E.M., Qiu, Y., Ghanbari Niaki, A., McLaughlin, G.A., Weidmann, C.A., Gerbich, T.M., Smith, J.A., Crutchley, J.M., Termini, C.M., Weeks, K.M., et al. (2018). mRNA structure determines specificity of a polyQ-driven phase separation. *Science* 360, 922–927.
- Lee, S., Kopp, F., Chang, T.-C., Sataluri, A., Chen, B., Sivakumar, S., Yu, H., Xie, Y., and Mendell, J.T. (2016). Noncoding RNA NORAD regulates genomic stability by sequestering PUMILIO proteins. *Cell* 164, 69–80.
- Livi, C.M., Klus, P., Delli Ponti, R., and Tartaglia, G.G. (2015). catRAPID signature: identification of ribonucleoproteins and RNA-binding regions. *Bioinformatics* 32, 773–775.
- Ma, D.K., Jang, M.-H., Guo, J.U., Kitabatake, Y., Chang, M.-L., Pow-Anpongkul, N., Flavell, R.A., Lu, B., Ming, G.-L., and Song, H. (2009). Neuronal activity-induced Gadd45b promotes epigenetic DNA demethylation and adult neurogenesis. *Science* 323, 1074–1077.
- Maharana, S., Wang, J., Papadopoulos, D.K., Richter, D., Pozniakovskiy, A., Poser, I., Bickle, M., Rizk, S., Guillén-Boixet, J., Franzmann, T.M., et al. (2018). RNA buffers the phase separation behavior of prion-like RNA binding proteins. *Science* 360, 918–921.

- Marchese, D., de Groot, N.S., Lorenzo Gotor, N., Livi, C.M., and Tartaglia, G.G. (2016). Advances in the characterization of RNA-binding proteins. *Wiley Interdiscip. Rev. RNA* 7, 793–810.
- Marchese, D., Botta-Orfila, T., Cirillo, D., Rodriguez, J.A., Livi, C.M., Fernández-Santiago, R., Ezquerra, M., Martí, M.J., Bechara, E., and Tartaglia, G.G.; Catalan MSA Registry (CMSAR) (2017). Discovering the 3' UTR-mediated regulation of alpha-synuclein. *Nucleic Acids Res.* 45, 12888–12903.
- Markmiller, S., Soltanieh, S., Server, K.L., Mak, R., Jin, W., Fang, M.Y., Luo, E.-C., Krach, F., Yang, D., Sen, A., et al. (2018). Context-dependent and disease-specific diversity in protein interactions within stress granules. *Cell* 172, 590–604.e13.
- Mateju, D., Franzmann, T.M., Patel, A., Kopach, A., Boczek, E.E., Maharana, S., Lee, H.O., Carra, S., Hyman, A.A., and Alberti, S. (2017). An aberrant phase transition of stress granules triggered by misfolded protein and prevented by chaperone function. *EMBO J.* 36, 1669–1687.
- Maurin, T., Zongaro, S., and Bardoni, B. (2014). Fragile X syndrome: from molecular pathology to therapy. *Neurosci. Biobehav. Rev.* 46, 242–255.
- Maziuk, B.F., Apicco, D.J., Cruz, A.L., Jiang, L., Ash, P.E.A., da Rocha, E.L., Zhang, C., Yu, W.H., Leszyk, J., Abisambra, J.F., et al. (2018). RNA binding proteins co-localize with small tau inclusions in tauopathy. *Acta Neuropathol. Commun.* 6, 71.
- Mitchell, S.F., Jain, S., She, M., and Parker, R. (2013). Global analysis of yeast mRNPs. *Nat. Struct. Mol. Biol.* 20, 127–133.
- Mittal, N., Scherrer, T., Gerber, A.P., and Janga, S.C. (2011). Interplay between posttranscriptional and posttranslational interactions of RNA-binding proteins. *J. Mol. Biol.* 409, 466–479.
- Moers, B.H.M., Logue, J.S., and Berglund, J.A. (2005). The structural basis of myotonic dystrophy from the crystal structure of CUG repeats. *Proc. Natl. Acad. Sci. USA* 102, 16626–16631.
- Morris, M.J., Wingate, K.L., Silwal, J., Leeper, T.C., and Basu, S. (2012). The porphyrin TmPyP4 unfolds the extremely stable G-quadruplex in MT3-MMP mRNA and alleviates its repressive effect to enhance translation in eukaryotic cells. *Nucleic Acids Res.* 40, 4137–4145.
- Murakami, T., Qamar, S., Lin, J.Q., Schierle, G.S.K., Rees, E., Miyashita, A., Costa, A.R., Dodd, R.B., Chan, F.T.S., Michel, C.H., et al. (2015). ALS/FTD mutation-induced phase transition of FUS liquid droplets and reversible hydrogels into irreversible hydrogels impairs RNP granule function. *Neuron* 88, 678–690.
- Mutsuddi, M., Marshall, C.M., Benzow, K.A., Koob, M.D., and Rebay, I. (2004). The spinocerebellar ataxia 8 noncoding RNA causes neurodegeneration and associates with *staufen* in *Drosophila*. *Curr. Biol.* 14, 302–308.
- Csárdi, G., and Nepusz, T. (2006). The igraph software package for complex network research. *InterJournal Complex Syst.*, 1695.
- Patel, A., Lee, H.O., Jawerth, L., Maharana, S., Jahnel, M., Hein, M.Y., Stoyanov, S., Mahamid, J., Saha, S., Franzmann, T.M., et al. (2015). A liquid-to-solid phase transition of the *als* protein *fus* accelerated by disease mutation. *Cell* 162, 1066–1077.
- Pavel, M., Imarisio, S., Menzies, F.M., Jimenez-Sanchez, M., Siddiqi, F.H., Wu, X., Renna, M., O'Kane, C.J., Crowther, D.C., and Rubinsztein, D.C. (2016). CCT complex restricts neuropathogenic protein aggregation via autophagy. *Nat. Commun.* 7, 13821.
- Pettersson, O.J., Aagaard, L., Jensen, T.G., and Damgaard, C.K. (2015). Molecular mechanisms in DM1—a focus on foci. *Nucleic Acids Res.* 43, 2433–2441.
- Procaccio, V., Salazar, G., Ono, S., Styers, M.L., Gearing, M., Davila, A., Jimenez, R., Juncos, J., Gutekunst, C.-A., Meroni, G., et al. (2006). A mutation of beta-actin that alters depolymerization dynamics is associated with autosomal dominant developmental malformations, deafness, and dystonia. *Am. J. Hum. Genet.* 78, 947–960.
- Qamar, S., Wang, G., Randle, S.J., Ruggeri, F.S., Varela, J.A., Lin, J.Q., Phillips, E.C., Miyashita, A., Williams, D., Ströhl, F., et al. (2018). FUS phase separation is modulated by a molecular chaperone and methylation of arginine cation- $\pi$  interactions. *Cell* 173, 720–734.e15.
- Reineke, L.C., Kedersha, N., Langereis, M.A., van Kuppeveld, F.J.M., and Lloyd, R.E. (2015). Stress granules regulate double-stranded RNA-dependent protein kinase activation through a complex containing G3BP1 and Caprin1. *MBio* 6, e02486.
- Riback, J.A., Katanski, C.D., Kear-Scott, J.L., Piliipenko, E.V., Rojek, A.E., Sosnick, T.R., and Drummond, D.A. (2017). Stress-triggered phase separation is an adaptive, evolutionarily tuned response. *Cell* 168, 1028–1040.e19.
- Ribeiro, D.M., Zanzoni, A., Cipriano, A., Delli Ponti, R., Spinelli, L., Ballarino, M., Bozzoni, I., Tartaglia, G.G., and Brun, C. (2018). Protein complex scaffolding predicted as a prevalent function of long non-coding RNAs. *Nucleic Acids Res.* 46, 917–928.
- Rivière, J.-B., van Bon, B.W.M., Hoischen, A., Kholmanskikh, S.S., O'Roak, B.J., Gilissen, C., Gijsen, S., Sullivan, C.T., Christian, S.L., Abdul-Rahman, O.A., et al. (2012). De novo mutations in the actin genes *ACTB* and *ACTG1* cause Baraitser-Winter syndrome. *Nat. Genet.* 44, 440–444.
- Saha, S., and Hyman, A.A. (2017). RNA gets in phase. *J. Cell Biol.* 216, 2235–2237.
- Sellier, C., Rau, F., Liu, Y., Tassone, F., Hukema, R.K., Gattoni, R., Schneider, A., Richard, S., Willemsen, R., Elliott, D.J., et al. (2010). Sam68 sequestration and partial loss of function are associated with splicing alterations in FXTAS patients. *EMBO J.* 29, 1248–1261.
- Sellier, C., Freyermuth, F., Tabet, R., Tran, T., He, F., Ruffenach, F., Alunni, V., Moine, H., Thibault, C., Page, A., et al. (2013). Sequestration of DROSHA and DGCR8 by expanded CGG RNA repeats alters microRNA processing in fragile X-associated tremor/ataxia syndrome. *Cell Rep.* 3, 869–880.
- Sellier, C., Buijsen, R.A.M., He, F., Natla, S., Jung, L., Tropel, P., Gaucherot, A., Jacobs, H., Meziane, H., Vincent, A., et al. (2017). Translation of expanded CGG repeats into fmrpolyg is pathogenic and may contribute to fragile X tremor ataxia syndrome. *Neuron* 93, 331–347.
- Semba, K., Araki, K., Li, Z., Matsumoto, K., Suzuki, M., Nakagata, N., Takagi, K., Takeya, M., Yoshinobu, K., Araki, M., et al. (2006). A novel murine gene, *Sickle tail*, linked to the Danforth's short tail locus, is required for normal development of the intervertebral disc. *Genetics* 172, 445–456.
- Strack, R.L., Disney, M.D., and Jaffrey, S.R. (2013). A superfolder Spinach2 reveals the dynamic nature of trinucleotide repeat-containing RNA. *Nat. Methods* 10, 1219–1224.
- Tan, J.H., and Fraser, A.G. (2017). The combinatorial control of alternative splicing in *C. elegans*. *PLoS Genet.* 13, e1007033.
- Tartaglia, G.G., and Vendruscolo, M. (2009). Correlation between mRNA expression levels and protein aggregation propensities in subcellular localisations. *Mol. Biosyst.* 5, 1873–1876.
- Tassone, F., Iwahashi, C., and Hagerman, P.J. (2004). FMR1 RNA within the intranuclear inclusions of fragile X-associated tremor/ataxia syndrome (FXTAS). *RNA Biol.* 1, 103–105.
- Tassone, F., Beilina, A., Carosi, C., Albertosi, S., Bagni, C., Li, L., Glover, K., Bentley, D., and Hagerman, P.J. (2007). Elevated FMR1 mRNA in premutation carriers is due to increased transcription. *RNA* 13, 555–562.
- Tichon, A., Gil, N., Lubelsky, Y., Solomon, T.H., Lemze, D., Itzkovitz, S., Stern-Ginossar, N., and Ulitsky, I. (2016). A conserved abundant cytoplasmic long noncoding RNA modulates repression by Pumilio proteins in human cells. *Nat. Commun.* 7, 12209.
- Todd, P.K., Oh, S.Y., Krans, A., He, F., Sellier, C., Frazer, M., Renoux, A.J., Chen, K.C., Scaglione, K.M., Basur, V., et al. (2013). CGG repeat-associated translation mediates neurodegeneration in fragile X tremor ataxia syndrome. *Neuron* 78, 440–455.
- Van Nostrand, E.L., Pratt, G.A., Shishkin, A.A., Gelboin-Burkhart, C., Fang, M.Y., Sundaraman, B., Blue, S.M., Nguyen, T.B., Surka, C., Elkins, K., et al. (2016). Robust transcriptome-wide discovery of RNA-binding protein binding sites with enhanced CLIP (eCLIP). *Nat. Methods* 13, 508–514.
- Van Treeck, B., and Parker, R. (2018). Emerging roles for intermolecular RNA-RNA interactions in RNP assemblies. *Cell* 174, 791–802.
- Wan, Y., Qu, K., Zhang, Q.C., Flynn, R.A., Manor, O., Ouyang, Z., Zhang, J., Spitale, R.C., Snyder, M.P., Segal, E., and Chang, H.Y. (2014). Landscape

- and variation of RNA secondary structure across the human transcriptome. *Nature* **505**, 706–709.
- West, J.A., Mito, M., Kurosaka, S., Takumi, T., Tanegashima, C., Chujo, T., Yanaka, K., Kingston, R.E., Hirose, T., Bond, C., et al. (2016). Structural, super-resolution microscopy analysis of paraspeckle nuclear body organization. *J. Cell Biol.* **214**, 817–830.
- White, M.C., Gao, R., Xu, W., Mandal, S.M., Lim, J.G., Hazra, T.K., Wakamiya, M., Edwards, S.F., Raskin, S., Teive, H.A.G., et al. (2010). Inactivation of hnRNP K by expanded intronic AUUCU repeat induces apoptosis via translocation of PKCdelta to mitochondria in spinocerebellar ataxia 10. *PLoS Genet.* **6**, e1000984.
- Willemsen, R., Hoogeveen-Westerveld, M., Reis, S., Holstege, J., Severijnen, L.-A.W.F.M., Nieuwenhuizen, I.M., Schrier, M., van Unen, L., Tassone, F., Hoogeveen, A.T., et al. (2003). The FMR1 CGG repeat mouse displays ubiquitin-positive intranuclear neuronal inclusions; implications for the cerebellar tremor/ataxia syndrome. *Hum. Mol. Genet.* **12**, 949–959.
- Woodruff, J.B., Ferreira Gomes, B., Widlund, P.O., Mahamid, J., Honigsmann, A., and Hyman, A.A. (2017). The centrosome is a selective condensate that nucleates microtubules by concentrating tubulin. *Cell* **169**, 1066–1077.e10.
- Zhang, H., Elbaum-Garfinkle, S., Langdon, E.M., Taylor, N., Occhipinti, P., Bridges, A.A., Brangwynne, C.P., and Gladfelter, A.S. (2015). RNA controls PolyQ protein phase transitions. *Mol. Cell* **60**, 220–230.
- Zou, W., Chen, X., Shim, J.-H., Huang, Z., Brady, N., Hu, D., Drapp, R., Sigrist, K., Glimcher, L.H., and Jones, D. (2011). The E3 ubiquitin ligase Wwp2 regulates craniofacial development through mono-ubiquitylation of Goosecoid. *Nat. Cell Biol.* **13**, 59–65.

## STAR★METHODS

### KEY RESOURCES TABLE

| REAGENT or RESOURCE                                            | SOURCE                                                                          | IDENTIFIER                                                                           |
|----------------------------------------------------------------|---------------------------------------------------------------------------------|--------------------------------------------------------------------------------------|
| <b>Antibodies</b>                                              |                                                                                 |                                                                                      |
| Anti-TRA2A                                                     | Abcam                                                                           | ab72625; RRID:AB_1524507                                                             |
| Anti-TRA2B                                                     | Abcam                                                                           | ab31353; RRID:AB_778565                                                              |
| Anti-rabbit 647                                                | Abcam                                                                           | ab150115; RRID:AB_2687948                                                            |
| Anti-rabbit 488                                                | Abcam                                                                           | ab11008; RRID:AB_297665                                                              |
| Anti-ubiquitin                                                 | Dako                                                                            | Z0458; RRID:AB_2315524                                                               |
| Anti-rabbit Fab 488                                            | Molecular probes                                                                | A11070; RRID:AB_142134                                                               |
| Anti-mouse cy3                                                 | Jackson                                                                         | 715-165-150; RRID:AB_2340813                                                         |
| Anti-tubulin                                                   | Abcam                                                                           | ab7291; RRID:AB_2241126                                                              |
| Anti-mouse                                                     | Abcam                                                                           | ab97046; RRID:AB_10680920                                                            |
| FMRpolyG antibodies 8FM                                        | Dr. Renate Hukema<br>PMID: 26060190                                             | N/A                                                                                  |
| Anti-rabbit Protein G                                          | Merk                                                                            | 18-161; RRID:AB_2756347                                                              |
| Anti TMPyP4 tosylate                                           | Abcam                                                                           | ab120793; RRID:AB_2756346                                                            |
| <b>Biological Samples</b>                                      |                                                                                 |                                                                                      |
| Post-mortem Human Tissue                                       | Netherlands Brain Bank,<br>Netherlands Institute for<br>Neuroscience, Amsterdam | <a href="https://www.brainbank.nl/">https://www.brainbank.nl/</a> (project nr. 1084) |
| <b>Chemicals, Peptides, and Recombinant Proteins</b>           |                                                                                 |                                                                                      |
| Lipofectamine                                                  | Invitrogen                                                                      | 13778150                                                                             |
| DAB substrate                                                  | Dako                                                                            | K3468                                                                                |
| Brightvision poly-HRP-linker                                   | Immunologic                                                                     | DPVO-HRP 55                                                                          |
| Label IT Cy5                                                   | Mirus                                                                           | MIR 3725                                                                             |
| DNEM – Dulbecco’s Modified Eagle Medium                        | Sigma Aldrich                                                                   | D9785                                                                                |
| FBS – Fetal Bovine Serum                                       | Sigma Aldrich                                                                   | F9665                                                                                |
| MEM - Minimun Essential Medium Eagle                           | Sigma Aldrich                                                                   | M2279                                                                                |
| Trypan blue solution                                           | Sigma Aldrich                                                                   | T8154                                                                                |
| Sudan black B                                                  | Abcam                                                                           | Ab146284                                                                             |
| TBS – Tris Buffered Saline                                     | Sigma Aldrich                                                                   | T5912                                                                                |
| Tween 20                                                       | Sigma Aldrich                                                                   | P1379                                                                                |
| PBS – Phosphate buffered saline                                | Sigma Aldrich                                                                   | 79378                                                                                |
| 7a molecule                                                    | Dr. Mathew D. Disney,<br>Scripps Research Institute,<br>CA 92037, USA           | N/A                                                                                  |
| BSA – Bovine Serum Albumins                                    | Sigma Aldrich                                                                   | A2058                                                                                |
| Triton X-100                                                   | Sigma Aldrich                                                                   | 11332481001                                                                          |
| DAPI histology mounting médium                                 | Sigma Aldrich                                                                   | F6057                                                                                |
| <b>Critical Commercial Assays</b>                              |                                                                                 |                                                                                      |
| RNA extraction kit                                             | QIAGEN                                                                          | 74106                                                                                |
| SuperScript III First Strand Synthesis<br>SuperMix for qRT-PCR | Invitrogen                                                                      | 11752250                                                                             |
| SyBr Green MasterMix                                           | Invitrogen                                                                      | 4367659                                                                              |
| MiniElute PCR Purification kit                                 | QIAGEN                                                                          | 28004                                                                                |
| MEGAScript T7, High yield transcription kit                    | Invitrogen                                                                      | AM1334                                                                               |
| Cy5 label IT uArray Labeling kit                               | Mirus                                                                           | MIR3700                                                                              |
| Agencourt RNAClean XP magnetic beads                           | Beckman Coulter                                                                 | A63987                                                                               |

(Continued on next page)

**Continued**

| REAGENT or RESOURCE                          | SOURCE                                                | IDENTIFIER                                                                                                                                                                                                                                                                                                                                                                                                                                    |
|----------------------------------------------|-------------------------------------------------------|-----------------------------------------------------------------------------------------------------------------------------------------------------------------------------------------------------------------------------------------------------------------------------------------------------------------------------------------------------------------------------------------------------------------------------------------------|
| TURBODNase 2U/uL                             | Invitrogen                                            | AM2238                                                                                                                                                                                                                                                                                                                                                                                                                                        |
| Human Protein microarrays v5.2               | Life Technologies                                     | PAH0525101                                                                                                                                                                                                                                                                                                                                                                                                                                    |
| Stellaris RNA FISH                           | Biosearch Technologies                                | N/A                                                                                                                                                                                                                                                                                                                                                                                                                                           |
| Bradford Protein Assay                       | BioRad                                                | 5000205                                                                                                                                                                                                                                                                                                                                                                                                                                       |
| Luminata Starter kit                         | Millipore                                             | WBLUM0100                                                                                                                                                                                                                                                                                                                                                                                                                                     |
| Affimetrix Human Clariom D Array             | Thermo Fisher                                         | 902922                                                                                                                                                                                                                                                                                                                                                                                                                                        |
| TruSeq total RNA-rRNA depletion              | Illumina                                              | 20020596                                                                                                                                                                                                                                                                                                                                                                                                                                      |
| NuPAGE 4-12% Bis-Tris Protein Gel            | Thermo Fisher                                         | NP0321BOX                                                                                                                                                                                                                                                                                                                                                                                                                                     |
| Deposited Data                               |                                                       |                                                                                                                                                                                                                                                                                                                                                                                                                                               |
| Splicing arrays                              | This paper                                            | GEO:GSE108007                                                                                                                                                                                                                                                                                                                                                                                                                                 |
| RNA-Seq                                      | This paper                                            | GEO:GSE121304                                                                                                                                                                                                                                                                                                                                                                                                                                 |
| Experimental Models: Cell Lines              |                                                       |                                                                                                                                                                                                                                                                                                                                                                                                                                               |
| Human lymphocytes (CGG(41X))                 | Coriell repository                                    | NA20244A                                                                                                                                                                                                                                                                                                                                                                                                                                      |
| Human lymphocytes (CGG(90X))                 | Coriell repository                                    | GM06906B                                                                                                                                                                                                                                                                                                                                                                                                                                      |
| COS-7                                        | ATCC                                                  | CRL-1651                                                                                                                                                                                                                                                                                                                                                                                                                                      |
| Experimental Models: Organisms/Strains       |                                                       |                                                                                                                                                                                                                                                                                                                                                                                                                                               |
| Mouse C57BL/6                                | Dr. Renate Hukema,<br>PMID: 26060190<br>PMID:12700164 | N/A                                                                                                                                                                                                                                                                                                                                                                                                                                           |
| Oligonucleotides                             |                                                       |                                                                                                                                                                                                                                                                                                                                                                                                                                               |
| siTRA2A                                      | Ambion                                                | AM16704                                                                                                                                                                                                                                                                                                                                                                                                                                       |
| siTRA2B                                      | Ambion                                                | S12749                                                                                                                                                                                                                                                                                                                                                                                                                                        |
| Recombinant DNA                              |                                                       |                                                                                                                                                                                                                                                                                                                                                                                                                                               |
| <i>FMR1</i> 5'-UTR and control pCAGIG vector | Dr. Eulàlia Martí<br>PMID: 24418349                   | N/A                                                                                                                                                                                                                                                                                                                                                                                                                                           |
| GFP-TRA2A, GFP-TRA2B, GFP vectors            | Dr. Eulàlia Martí<br>PMID: 24418349                   | N/A                                                                                                                                                                                                                                                                                                                                                                                                                                           |
| Software and Algorithms                      |                                                       |                                                                                                                                                                                                                                                                                                                                                                                                                                               |
| GenePix Pro 6.1                              | Molecular Devices                                     | <a href="http://mdc.custhelp.com/app/answers/detail/a_id/18691/~/~genepix%C2%AE-pro-6-microarray-acquisition-%26-analysis-software-download-page">http://mdc.custhelp.com/app/answers/detail/a_id/18691/~/~genepix%C2%AE-pro-6-microarray-acquisition-%26-analysis-software-download-page</a>                                                                                                                                                 |
| Robust Multi-array Average (RMA)             | PMID: 12925520                                        | <a href="http://rmaexpress.bmbolstad.com/">http://rmaexpress.bmbolstad.com/</a>                                                                                                                                                                                                                                                                                                                                                               |
| LIMMA                                        | PMID: 24485249                                        | <a href="https://bioconductor.org/packages/release/bioc/html/limma.html">https://bioconductor.org/packages/release/bioc/html/limma.html</a>                                                                                                                                                                                                                                                                                                   |
| Transcriptome Analysis Console Software      | Thermo Fisher Scientific                              | <a href="https://www.thermofisher.com/us/en/home/life-science/microarray-analysis/microarray-analysis-instruments-software-services/microarray-analysis-software/affymetrix-transcriptome-analysis-console-software.html">https://www.thermofisher.com/us/en/home/life-science/microarray-analysis/microarray-analysis-instruments-software-services/microarray-analysis-software/affymetrix-transcriptome-analysis-console-software.html</a> |
| STAR_2.5.2                                   | PMID: 23104886                                        | <a href="https://github.com/alexdobin/STAR">https://github.com/alexdobin/STAR</a>                                                                                                                                                                                                                                                                                                                                                             |
| EventPointer v1.0.0                          | PMID: 27315794                                        | <a href="https://bioconductor.org/packages/release/bioc/html/EventPointer.html">https://bioconductor.org/packages/release/bioc/html/EventPointer.html</a>                                                                                                                                                                                                                                                                                     |
| DEXSeq v.24.2 package (R 3.4.0)              | PMID: 22722343                                        | <a href="https://bioconductor.org/packages/release/bioc/html/DEXSeq.html">https://bioconductor.org/packages/release/bioc/html/DEXSeq.html</a>                                                                                                                                                                                                                                                                                                 |
| ImageJ                                       | PMID: 22930834                                        | <a href="https://imagej.nih.gov/ij/download.html">https://imagej.nih.gov/ij/download.html</a>                                                                                                                                                                                                                                                                                                                                                 |
| igraph                                       | <a href="http://igraph.org/">http://igraph.org/</a>   | <a href="http://igraph.org/r/">http://igraph.org/r/</a>                                                                                                                                                                                                                                                                                                                                                                                       |
| R Studio 1.1.456                             | Rstudio                                               | <a href="https://www.rstudio.com/">https://www.rstudio.com/</a>                                                                                                                                                                                                                                                                                                                                                                               |
| R version 3.5.1                              | R                                                     | <a href="https://www.r-project.org/">https://www.r-project.org/</a>                                                                                                                                                                                                                                                                                                                                                                           |
| CROSS                                        | PMID: 27899588                                        | <a href="http://service.tartaglialab.com/new_submission/cross">http://service.tartaglialab.com/new_submission/cross</a>                                                                                                                                                                                                                                                                                                                       |
| catRAPID omics                               | PMID: 23975767                                        | <a href="http://s.tartaglialab.com/page/catrapid_omics_group">http://s.tartaglialab.com/page/catrapid_omics_group</a>                                                                                                                                                                                                                                                                                                                         |
| catGRANULE                                   | PMID: 27320918                                        | <a href="http://service.tartaglialab.com/new_submission/catGRANULE">http://service.tartaglialab.com/new_submission/catGRANULE</a>                                                                                                                                                                                                                                                                                                             |



## CONTACT FOR REAGENT AND RESOURCE SHARING

Further information and requests for resources and reagents should be directed to and will be fulfilled by the Lead Contact, Gian Gaetano Tartaglia ([gian.tartaglia@crg.eu](mailto:gian.tartaglia@crg.eu)).

## EXPERIMENTAL MODEL AND SUBJECT DETAILS

### Human lymphocytes

Human lymphocytes cells from Coriell repository (CGG(41X); Coriell repository number NA20244A and CGG(90X) Coriell repository number GM06906B) were grown in suspension in DMEM 10% fetal bovine serum (FBS) 1% Penicillin/Streptomycin, 2mM Glutamine at 37°C with a 5% CO<sub>2</sub> atmosphere. Cell counting was performed with Neubauer chamber.

### COS-7 cells

COS-7 cell lines were cultured in DMEM 10% FBS, 0,1% non-essential aminoacids, pyruvate and glutamine, at 37°C with a 5% CO<sub>2</sub> atmosphere. Cells were counted with a Neubauer chamber.

### Mouse model

We employed two established FXTAS mouse models: 1) the knock-in mouse in which the murine CGG repeat has been replaced by a human expanded repeat of 100-150 CGGs (Willemssen et al., 2003) and 2) an inducible model in which the 5'UTR containing 90 CGG repeats was expressed under the control of doxycycline (Hukema et al., 2015). Both male and female mice were used, since both genders form the characteristic inclusions. All experiments were conducted with the permission of the local institute of animal welfare (IVD) and the study was complying with ethical permission CCD license AVD101002015290. The knock-in mice were aged about 70 weeks. These mice were previously shown to contain ubiquitin positive intra-nuclear inclusions. For the doxycycline inducible mice, the dox treatment was of 12-28 week, which was sufficient to allow formation of inclusions.

### Human post-mortem samples

We collected samples from one male (died at age 73) and one female (84 years old), both in the premutation range (100 CGG repeats). The brain samples were obtained from the Netherlands Brain Bank (NBB; project nr. 1084), Netherlands Institute for Neuroscience, Amsterdam (open access <https://www.brainbank.nl/>). All material has been collected from donors for or from whom a written informed consent for a brain autopsy and the use of the material and clinical information for research purposes had been obtained by the NBB.

## METHOD DETAILS

### RNA IVT and Protein arrays

*FMR1* 5'-UTR expanded and control pCAGIG vectors, with 79 and 21 repeats, respectively, were generated by Dr. Marti's group. The UTRs were subcloned in PBSK plasmid containing promoters suitable for *in vitro* transcription. The plasmid was digested in final volume reaction of 30ul with restriction enzymes and the digestion was ensured by loading 1ul in a 1% agarose gel. The reaction was purified with the MinElute PCR Purification Kit following manufacturer's instructions. *In vitro* transcription was performed with the T7 Megascript T7, High Yield Transcription Kit, Invitrogen, Thermo Scientific according to standard procedure with the addition of 1% DMSO and 1% ribolock, overnight at 37°C. The synthesized RNA was treated with TURBODNase 2U/ul (Invitrogen) at 37°C for 15min. The RNA was purified with magnetic beads (Agencourt RNA Clean XP) eluting in 30ul of nuclease-free water. The integrity and specificity of the RNA was checked by means of RNA denaturing agarose gel and Bioanalyzer quality control.

The CGGxRNA was fluorescently labeled with Cy5 Label IT uArray Labeling Kit (Mirus) with slight modifications from standard protocol. Briefly, 5ug of RNA were mixed with 1:5 Label IT Cy5 reagent and incubated in a final volume of 25ul at 37°C for 70min. The reaction was stopped by adding 2.5ul of 10X Stop solution. Again the labeled RNA was purified with magnetic beads (Agencourt RNA Clean XP).

The RNA concentration and labeling density were measured with Nanodrop 1000 spectrophotometer (Thermo Scientific) and calculated as follows.

Only reactions with an RNA labeling density of 1 Cy5 dye per 700-900 nt were used.

$$\text{Base:dye} = (\text{Abase} \cdot \epsilon \text{ dye}) / (\text{A dye} \cdot \epsilon \text{ base})$$

$$\text{Abase} = \text{A260} - (\text{A dye} \cdot \text{CF260})$$

Constants:

$$\epsilon \text{ dye} = 250000$$

$$\text{CF260} = 0.05$$

$$\epsilon \text{ base} = 8250$$

Labeled RNA integrity was verified with the Agilent 2100 Bioanalyzer.

50 pmoles of labeled RNA were hybridized in the protein arrays Human Protein Microarrays v5,2, Life Technologies.

The arrays were dried and immediately scanned at 635nm in Microarray Scanner G2505B (Agilent). GenePix Pro 6.1 software (Molecular Devices) was used to determine the signal at 635nm of each spotted protein location and therefore quantify the RNA-protein interaction. Specifically, the local background intensity (B635) was subtracted from the intensity (F635) at each of the duplicate spots for a given protein, to quantify. Data was filtered based on signal to background ratio for each of the duplicate feature to be greater than 2.5 fold and Z-Score  $\geq 3$  from the global mean signal from all the spotted proteins. Finally, the intersection of technical replicates was considered as the final value for quantification.

### IF-RNA FISH in COS-7 cells

COS-7 cells were grown on 13mm coverslips until a 70% confluence. Cells were transfected with lipofectamine 2000 (Invitrogen, #13778150) according to manufacturer's instructions and stained after 24 hours.

siRNA treatments were performed with lipofectamine 2000 (Invitrogen, 11668019) using different siRNA sequences (siTRA2A, Ambion AM16704, siTRA2B, Ambion S12749, compared to water). Overexpression of proteins was achieved by transfection of GFP-TRA2A, GFP-TRA2B, compared with GFP-vector, all plasmids kindly given by Dr. Nicolas Charlet-Berguerand. For further treatments, cells were incubated with 25nM TMP4yP (Abcam ab120793) or 15uM of *1a* molecule (this latter kindly given by Matthew D. Disney).

Prior to immunostaining, cells were fixed with 4% paraformaldehyde for 10 minutes and washed three times with PBS. Permeabilization was done with Triton X-100 0.1% for 5 minutes. Cells were washed 3 times with PBS and then blocked with BSA 1% solution for 20 minutes and washed again with PBS. Primary antibodies were used in a 1:50 dilution (antiTRA2A, Abcam, ab72625, antiTRA2B, Abcam, ab31353). Secondary antibodies (anti Rabbit 647, ab150115, anti-rabbit 488, ab11008) were used in a 1:200 dilution after three washes with PBS solution. RNA FISH assay was done after the immunostaining according to manufacturer's protocol (Stellaris, Biosearch Technologies). The RNA FISH probe ((GGC)8X-Cy3, Sigma) was used at 125nM final concentration and cells were then incubated at 37°C overnight, as reported in Sellier et al., 2010. Finally, cells were mounted directly in Fluoroshield with DAPI histology mounting medium (Sigma, #F6057). All coverslips were examined using a fluorescence microscope (Leica) coupled to a DMI600 camera. Intensity graphs were generated with ImageJ software to assess levels of colocalization of signals from different fluorescence channels.

### q-PCR

Human lymphocytes were washed and pelleted by centrifugation at 800rpm for 2 min. COS-7 cells were trypsinized and pelleted by centrifugation at 1200rpm for 2 minutes. RNA extraction from the different cultured cells was done according to manufacturer's instructions (QIAGEN, #50974136). cDNA was generated by RT-PCR using SuperScript III First-Strand Synthesis SuperMix for qRT-PCR (Invitrogen, # 11752250) to quantify mRNAs. q-PCR was performed using Sybr Green master mix (Invitrogen, # 4367659) and analyzed by AB7900HT (Leica). In all experiments, GAPDH was used as internal control in all experiments.

### Western Blot

Total proteins from human lymphocytes and COS-7 cells (one day post-transfection) were extracted. The level of protein was measured by the Bio-Rad Protein Assay according to manufacturer's instructions. All lysates were resolved in a 4%–12% gel (NuPAGE, Invitrogen) according to the molecular size of the proteins and then transferred to a nitrocellulose membrane 0.2  $\mu$ m. The membranes were blocked with 5% non-fat dry milk in TBS-Tween 1% then washed with PBS and incubated with anti TRA2A (1:1000, Abcam ab72625), anti TRA2B (1:500, Abcam ab31353) or anti Tubulin (1:5000, Abcam ab7291) overnight at 4°C. After primary antibodies treatment, membranes were washed three times with TBS-Tween 1% and then incubated with the secondary peroxidase antibody 1h with an anti-mouse (Abcam ab97046) or an anti-rabbit antibody (Protein G, Merk #18-161). Visualization of the signal was achieved by Luminata Starter kit (Millipore, WBLUM0100) according to manufacturer's recommended instructions, and with Amersham Imager 600.

### Immunohistochemistry and immunofluorescence from murine and human brain tissue

Tissues were fixed overnight in 4% paraformaldehyde and embedded in paraffin according to standard protocols. Sections (6 $\mu$ m) were deparaffinized followed by antigen retrieval using microwave treatment in 0.01M sodium citrate. Endogenous peroxidase activity was blocked and immunostaining was performed overnight at 4°C using TR2A (Abcam, ab72625) and 8FM 1:10 antibodies (Buijssen et al., 2014). In order to better visualize inclusions an extra antigen retrieval step was added, using proteinase K. Antigen-antibody complexes were visualized by incubation with DAB substrate (Dako, K3468) after incubation with Brightvision poly-HRP-linker (Immunologic, DPVO-HRP 55). Slides were counterstained with hematoxylin and mounted with Entellan.

For (double) immunofluorescence, slides were blocked for auto-fluorescence with Sudan Black in 70% ethanol. Primary antibodies include TR2A (Abcam, ab72625), 8FM 1:10 (Buijssen et al., 2014) and ubiquitin (Dako, Z0458). Secondary antibodies were anti-rabbit Fab 488 (Molecular Probes, A11070) and anti-mouse cy3 (Jackson, 715-165-150). Nuclei were visualized with Hoechst (Figure S7).

### Quantification of TRA2A levels in presence of CGG aggregates

We quantified the amount of soluble protein in presence of CGG aggregates by microscopy in COS-7 cells, and found that around 20%–25% of TRA2A protein is present in the inclusions. Specifically, we assessed the intensity of the signal from endogenous TRA2A in cells from four different experiments upon overexpression of CGG (ImageJ), we measured the signal from TRA2A antibody for each cell from by selecting i) the Intensity Density (ID) from the Area from all the aggregates colocalizing with CGG signal; ii) the total ID for each cell; iii) the subtraction of the total ID minus the sum of all the aggregates, then meaning the signal background; and finally iv) the fraction of protein that is in the aggregates in respect to the total of protein diffused.

Levels of functional protein are altered, in a magnitude that ranges from 20%–25%, which is fully compatible with previous reports in literature (Colomer et al., 1996; Grousl et al., 2018).

## QUANTIFICATION AND STATISTICAL ANALYSIS

### Data acquisition and composition

Granule-forming proteins were extracted from a previous publication (Jain et al., 2016) that reports the most exhaustive list of components for cytoplasmic RNP granules to date, comprising 205 yeast and 411 human granule-forming proteins (Figure S1A; Tables S1A–S1F).

Human PPIs were taken from the BioPlex database (Huttlin et al., 2015) that includes highly curated data produced by high-throughput affinity-purification mass spectrometry. BioPlex contains 56,554 interactions among 510,882 different proteins (Figure 1A; Figure S1C). Human PRIs were identified through eCLIP experiments (Van Nostrand et al., 2016). The dataset contains 1,103,800 interactions of 78 proteins in the K562 cell line (Figure 1B; Table S1B; Figure S1C). We processed the eCLIP data normalizing the number of reads by gene expression (Armaos et al., 2017). We considered interactions having values of number of reads by expression level higher than the first, second and third quartile of the distribution of the whole dataset (Figure S2; Tables S1C–S1E). After data normalization and filtering, the dataset includes 22,961 transcripts interacting with at least one protein (20,724 coding and 2,237 non-coding). We extracted the expression levels for K562 transcripts from the ENCODE project (Armaos et al., 2017).

For yeast analysis we used the dataset reported in a previous article (Mittal et al., 2011) that includes both protein-protein and PRIs. The protein-protein network is based on the integration of two mass spectrometry studies that comprise a total of 5,303 proteins and 401,821 interactions (Mittal et al., 2011) (Figure 1A). PRIs were extracted from the integration of four different studies on immunoprecipitation of RBPs followed by microarray analysis of the bound transcripts (Table S1F). The data includes a total of 24,932 interactions from 69 RBPs to 6,159 transcripts.

We considered non-granule forming those RBPs present in the protein-RNA dataset and not described as granule-forming in a previous article (Jain et al., 2016) (Figure S1; Tables S1A–S1E). There are 22,571 transcripts interacting with at least one granule-forming protein, 287 transcripts interacting only with granule-forming proteins and 390 with only non-granule forming proteins.

In the case of the granule and non-granule protein-protein networks comparison, we included RBP lists provided by (Brannan et al., 2016; Gerstberger et al., 2014) for yeast and human. These datasets comprise a total of 690 yeast RBPs and 1,795 human RBPs.

### Network analysis

Protein-protein and protein-RNA networks consisted of a set of nodes (protein or RNAs) that are connected through edges (interactions). All network analyses were performed in the R environment (<http://www.r-project.org>) using the igraph package (<http://igraph.org/>) (Csárdi and Nepusz, 2006). We employed build-in functions to compute degree, betweenness and closeness measures of centrality. Networks were considered directionless and unweighted. Degree centrality is defined as the number of edges a node has. The other centrality measures were based on the shortest path length between nodes in the network (i.e., minimum number of edges between two certain nodes). In this sense, betweenness is defined as the number of shortest paths in the network that go through a certain node. Closeness centrality is the inverse of the average of the shortest path between a certain node and all the other nodes in the network. We compared the distribution of centrality values for granule and non-granule RBPs in the same global protein-protein or protein-RNA network (Figure 1A; Figures S1C and S1D).

We used the Jaccard index (Tables S1G–S1J) as a measure of the overlap of RNA targets between pairs of proteins. The Jaccard index of a specific couple of proteins a and b ( $J_{a,b}$ ) was computed as:

$$J_{a,b} = \frac{|A \cap B|}{|A \cup B|}$$

where A is the set of RNA targets of the first protein of the pair, B is the set of RNA targets of the second protein of the pair,  $|A \cap B|$  is the size of the intersection of A and B (i.e., number of RNA targets shared by the two proteins) and  $|A \cup B|$  is the size of the union of A and B (i.e., the total number of RNA targets of A and B minus the number of shared RNA targets).

### RNA properties analysis

To study features of granule and non-granule transcripts, we compared RNAs with the same number of total protein contacts (Tables S2A–S2C). We used a cut-off of 10 RBP contacts in the human analysis and 5 contacts in the yeast case. The total number of contacts was chosen to have granule and non-granule sets of comparable size (Tables S2B and S2C), yet we note that the results are independent of a particular cut-off. Granule transcripts are contacted by a larger number of granule-forming RBPs than non-granule-forming RBPs (*viceversa* for non-granule transcripts).

The UTR analysis is based on Ensembl annotation (Tables S2B and S2C).

### RNA secondary structure

To profile the secondary structure of granule and non-granule transcripts (Figures 2B and 2C; Figure S3E; Tables S2B and S2C), we used PARS data (Kertesz et al., 2010; Wan et al., 2014). PARS distinguishes double- and single-stranded regions using the catalytic activity of two enzymes, RNase V1 (able to cut double-stranded nucleotides) and S1 (able to cut single-stranded nucleotides). Nucleotides with a PARS score higher than 0 indicate double-stranded conformation, while values lower than 0 are considered single-stranded (Kertesz et al., 2010; Wan et al., 2014). Undetermined nucleotides with a PARS score of 0 were discarded from our analysis. For each transcript, we counted the number of nucleotides with PARS score above zero divided by total length of the sequence.

We also predicted the secondary structure of granule and non-granule transcripts using CROSS (PARS human model; Figure 2F; Figures S4A). Input sequences were the same employed for the granule RNA properties analysis. For each sequence, structural content is defined as the percentages of nucleotides with a CROSS score bigger than 0.5 (double-stranded prone).

### Statistical analysis

To assess whether granule RBPs exhibit different trends compared to non-granule RBPs, we used the Wilcoxon test (also called Mann-Whitney U test). Wilcoxon test is a non-parametric test used to compare the mean of two distributions without any given assumption about them. To compare properties of highly versus lowly contacted RNAs and difference in target overlap between granule and non-granule pairs, we used the Kolmogorov-Smirnov test (KS test). KS test is also a non-parametric test used to compare the distance between two cumulative distribution functions (CDFs).

## DATA AND SOFTWARE AVAILABILITY

### catRAPID omics analysis

catRAPID omics was used to compute the interaction propensity (Figures 3A and 3C) of CGG repeats with proteins (Agostini et al., 2013). catRAPID omics ranks predictions based on interactions score as well as presence of motifs and RBDs (Bellucci et al., 2011). For RNA sequences > 1000 nt, the uniform fragmentation procedure is applied to determine the binding regions of a protein. The software is available at [http://s.tartagialab.com/page/catrapid\\_omics\\_group](http://s.tartagialab.com/page/catrapid_omics_group).

### catGRANULE analysis

Structural disorder, nucleic acid binding propensity and amino acid patterns such as arginine-glycine and phenylalanine-glycine are key features of proteins coalescing in granules (Bolognesi et al., 2016). These features were combined in a computational approach, catGRANULE, that we employed to identify RBPs assembling into granules (scores > 0 indicate granule propensity; Figure 2D) (Bolognesi et al., 2016). The software is available at [http://service.tartagialab.com/new\\_submission/catGRANULE](http://service.tartagialab.com/new_submission/catGRANULE).

### Splicing Arrays experiments and analysis

COS-7 cells were grown in P10 plates and cultured in different conditions and in three biological replicates each: control, (CGG)60X 185ng, siTRA2A 50nM, (CGG)60X 185ng+siTRA2A 13.6ng, GFP-TRA2A 200ng, (CGG)60X 185ng + GFP-TRA2A 200ng.

Total RNA extraction was performed with QIAGEN RNeasy Mini Kit including DNase treatment according to manufacturer's instructions. RNA amount was quantified and controlled with Nanodrop and Bioanalyzer. 100ng of total RNA from each sample were labeled according to the Affymetrix GeneChip® Whole Transcript Plus protocol, and hybridized to Affymetrix Human Clariom D array using a Affymetrix GeneChip Hybridization Oven 645, in Servei de Microarrays (IMIM-Barcelona). GeneChip was scanned using Affymetrix GeneChip Scanner 3000 7G. The data were analyzed using the RMA algorithm and then LIMMA was applied to calculate significant differential expression between samples. Splicing arrays were analyzed with the Transcriptome Analysis Console Software (Thermo Fisher Scientific), setting the following thresholds and methods: Gene-Level Fold Change < -2 or > 2, Gene-Level P value < 0,05, Splicing Index < -2 or > 2, Exon-Level P value < 0,05, Anova Method: ebayes, Probeset (Gene/Exon) considered expressed if ≥ 50% samples have DABG values below DABG Threshold (DABG < 0,05), event Pointer P value < 0,1 and event score > 0,2. Data are deposited in GEO repository with accession number GEO: GSE108007.

### RNA-seq experiments and analysis

An aliquot of the same RNA extracted from COS-7 cells for splicing arrays (previous section) was used for RNASEQ, in three biological replicates each: control, (CGG)60X 185ng, siTRA2A 50nM, (CGG)60X 185ng+siTRA2A 13.6ng, GFP-TRA2A 200ng, (CGG)60X

185ng + GFP-TRA2A 200ng. 500ng of total RNA were used for library preparation with TruSeq total RNA-rRNA depletion (Illumina). The sequencing was performed with HiSeq3000, paired-end, 2X125, 3samples/lane.

Nucleotide alignments were performed using STAR\_2.5.2 with reference genome and annotations taken from Gencode Release 27 (GRCh38.p10) (<http://www.gencodegenes.org/releases/current.html>). Pre-processing of bam files was made with python scripts (“dexseq\_prepare\_annotation.py” and “dexseq\_count.py”) provided in the DEXSeq v 1.24.2 R package. Statistical analysis of alternative splicing events was done with R 3.4.0 using two methods: EventPointer v1.0.0 and DEXSeq v 1.24.2. Data are deposited in GEO repository with accession number GEO: GSE121304.

**Cell Reports, Volume 25**

**Supplemental Information**

**An Integrative Study of Protein-RNA Condensates  
Identifies Scaffolding RNAs and Reveals Players  
in Fragile X-Associated Tremor/Ataxia Syndrome**

**Fernando Cid-Samper, Mariona Gelabert-Baldrich, Benjamin Lang, Nieves Lorenzo-Gotor, Riccardo Delli Ponti, Lies-Anne W.F.M. Severijnen, Benedetta Bolognesi, Ellen Gelpi, Renate K. Hukema, Teresa Botta-Orfila, and Gian Gaetano Tartaglia**

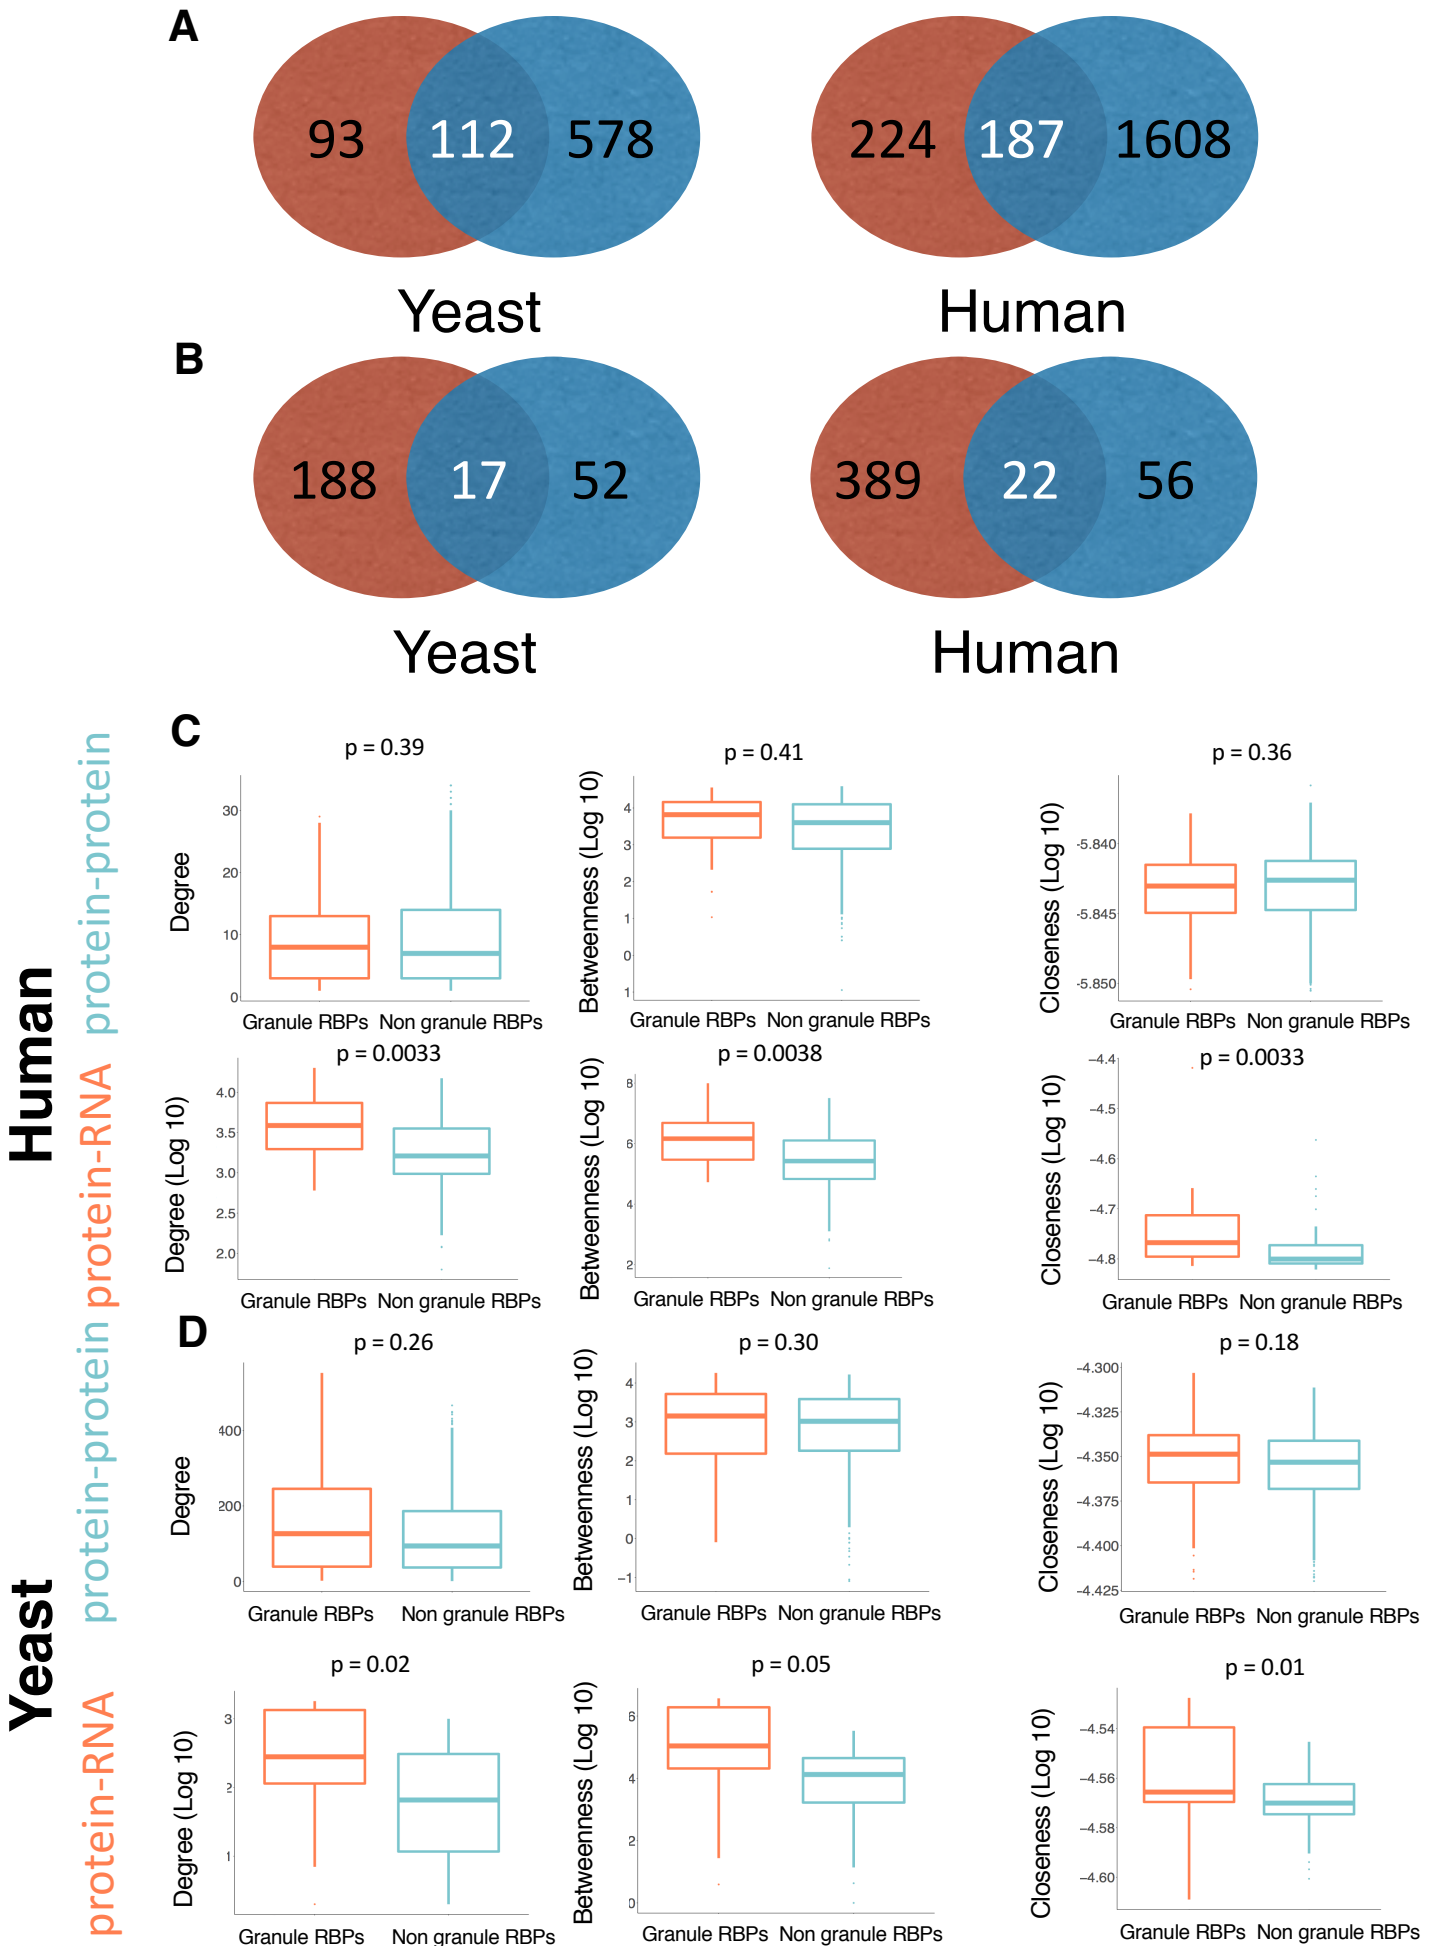

Supplementary Figure 1

**Supplementary Figure 1 [related to Figure 1]. Datasets** **A)** Granule RBPs Red circle: granule-forming proteins, Blue circle: RBPs, as defined in Gerstberger et al, 2014 (Gerstberger et al., 2014). Intersection represents granule RBPs. **B)** Number of interactions. Red circle: granule-forming proteins. Blue circle: RBPs with known targets. Intersection represents granule RBPs with known targets.

**Distribution of centrality values of granule and non-granule RBPs in different interaction networks.** **C)** Centrality distributions for the human dataset. Up: Protein-protein network. (p-value (left) = 0.39, p-value (centre) = 0.41, p-value (right) = 0.36. Down: Protein-RNA network (p-value (left) = 0.003, p-value (centre) = 0.007, p-value (right) = 0.01. **D)** Centrality distributions for the yeast dataset. Up: Protein-protein network. (p-value (left) = 0.26, p-value (centre) = 0.30, p-value (right) = 0.18. Down: Protein-RNA network (p-value (left) = 0.02, p-value (centre) = 0.05, p-value (right) = 0.01.



**A (Q1)**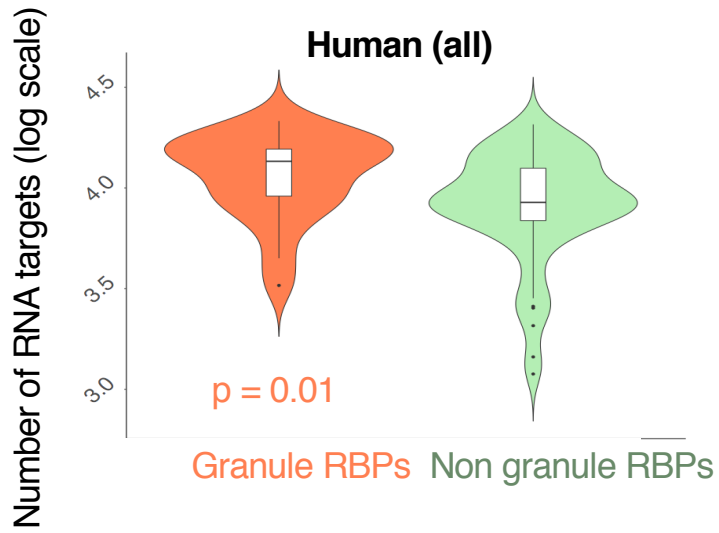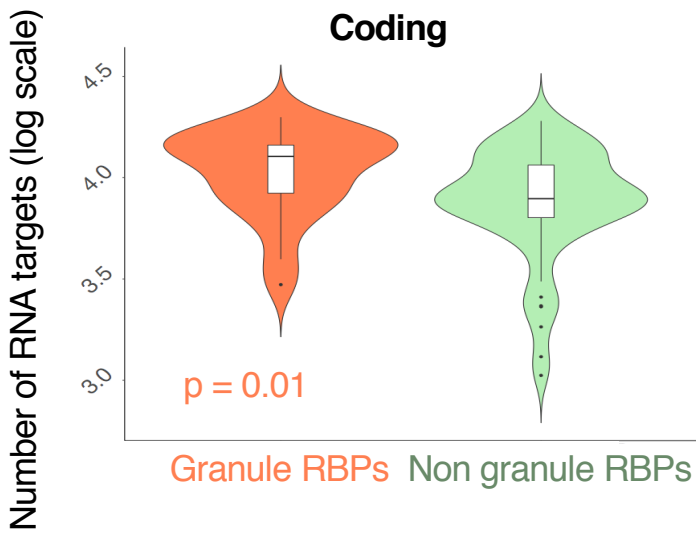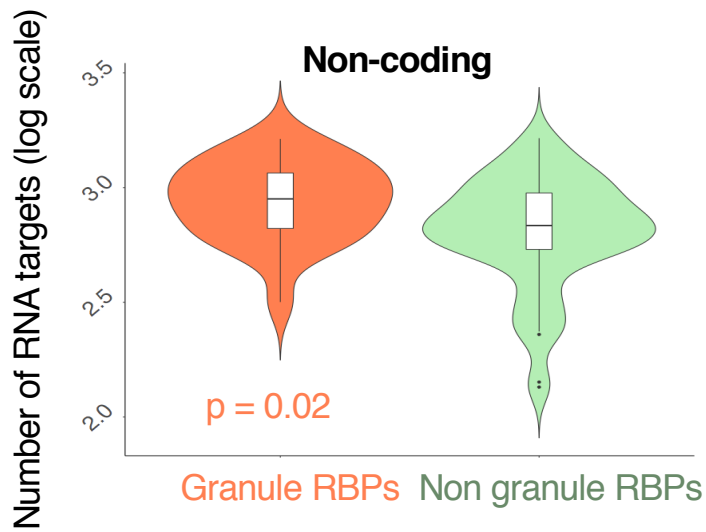**B (Q2)**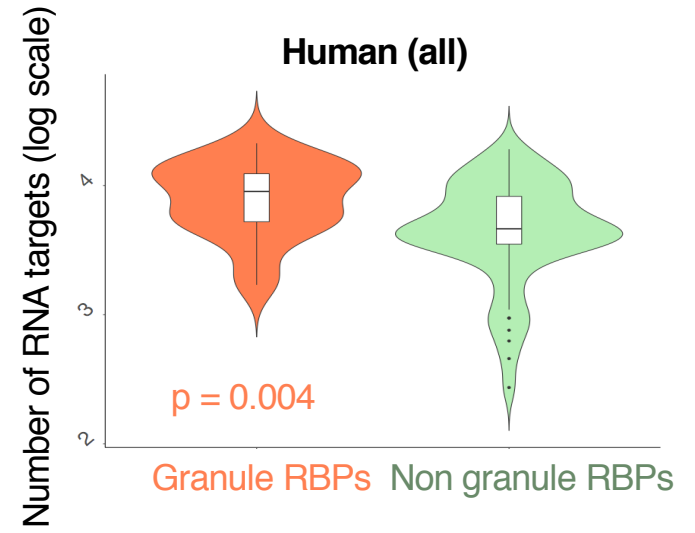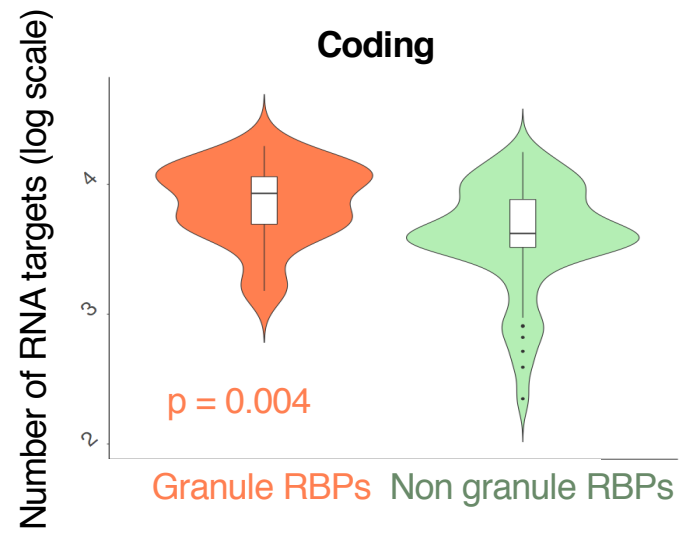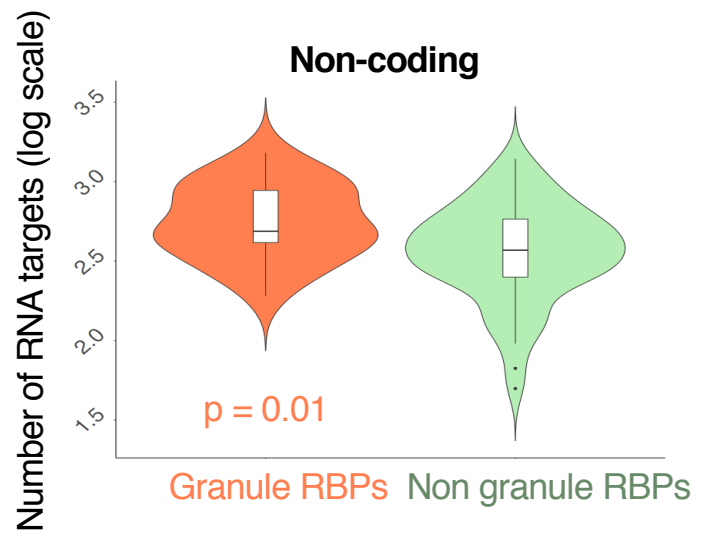

**Supplementary Figure 2 [related to Figure 1]. Number of RNA targets of granule and non-granule RBPs: A) First quartile of the reads/expression distribution (Q1). B) Second quartile (Q2).**

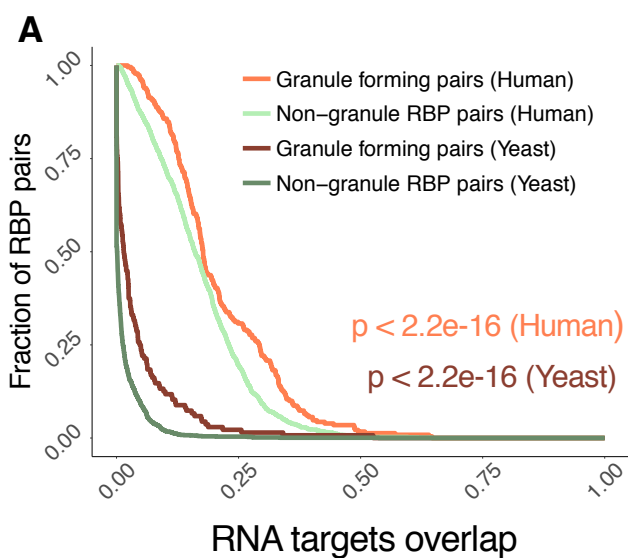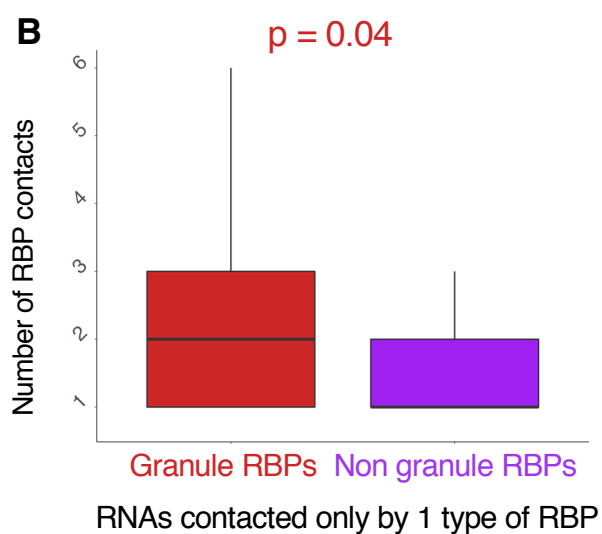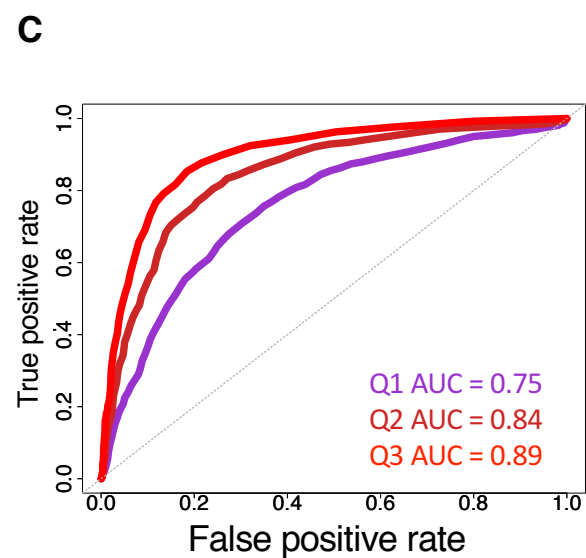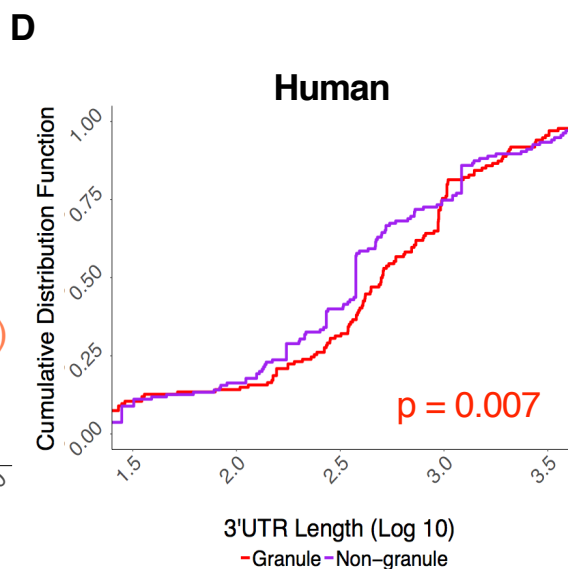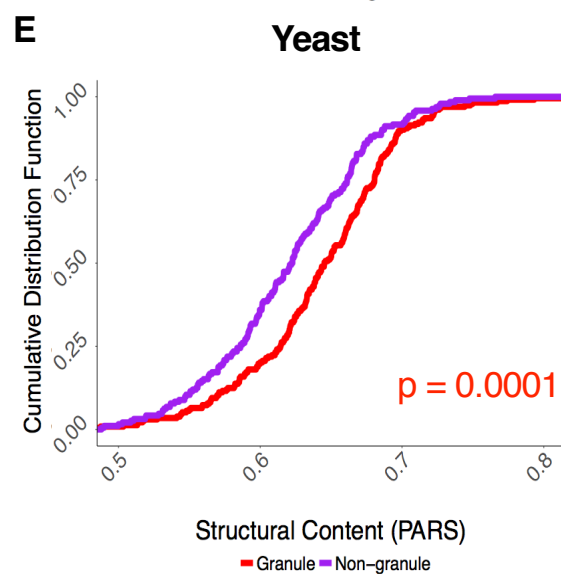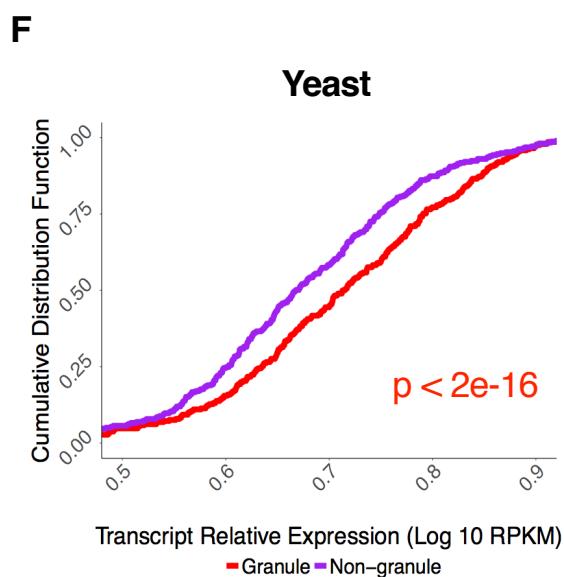

**Supplementary Figure 3 [related to Figure 1,2]. Properties of granule RNAs.** **A)** RNAs interacting exclusively with granule forming RBPs have higher number of protein contacts (p-value = 0.04, Wilcoxon test). Human transcripts: **B)** Granule RNAs have more structured UTRs (p-value = 0.007; KS test). PARS analysis on 3'UTR of granule and non-granule RNAs. Yeast granule RNA are **C)** structured (p-value = 0.001; KS test; PARS data), and **D)** more abundant (p-value = 2.2e-16; KS test) than non-granule RNAs. The UTR analysis was not performed due to the lack of annotation.

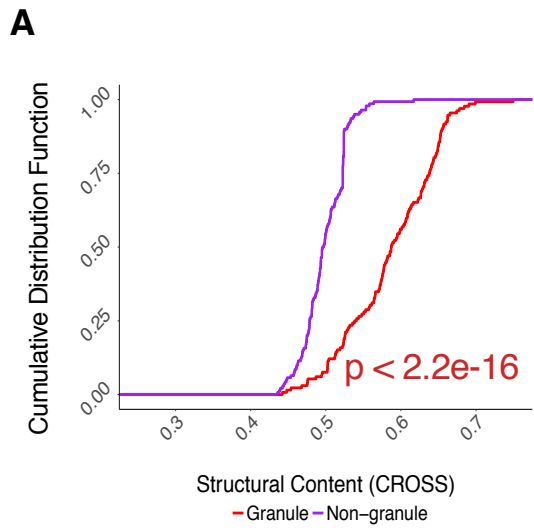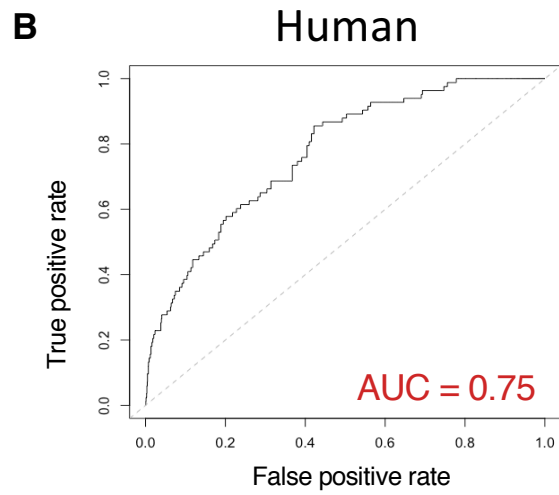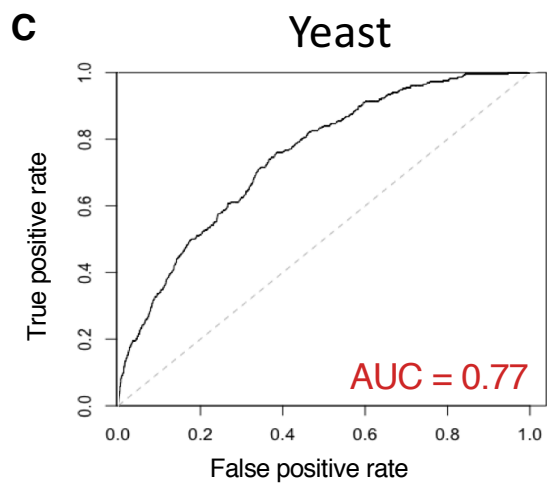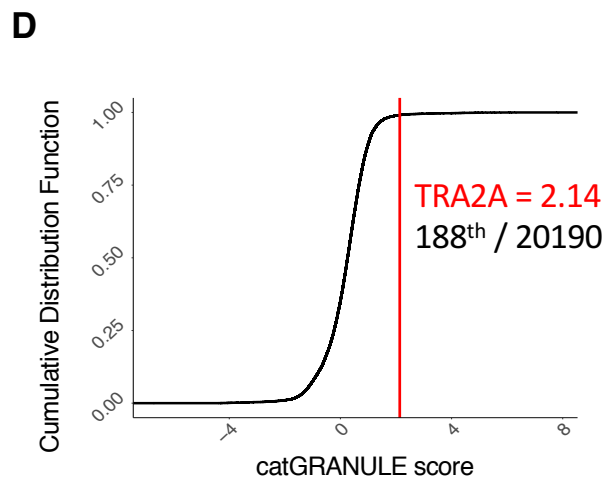

**Supplementary Figure 4 [related to Figure 2,3]. Computational predictions of granule-forming components.** **A)** Granule transcripts are predicted to be more structured (structural content according is measured using CROSS; p-value < 2.2e-16, KS test). **B** and **C)** *cat*GRANULE performances on human and yeast experimentally described granule-forming proteins. AUC (Area under the ROC curve) is used to measure the discriminative power of the method. **D)** Distribution of *cat*GRANULE scores for the whole human proteome. TRA2A (*cat*GRANULE score = 2.14) ranks 188<sup>th</sup> out of 20190 human proteins (i.e. 1% of the distribution).

**A**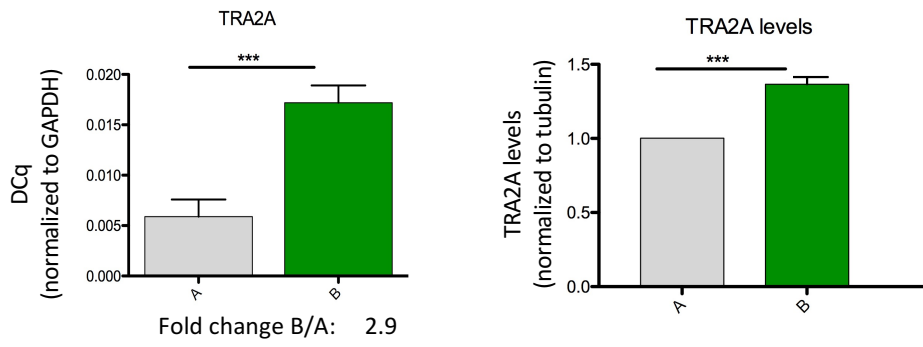**B**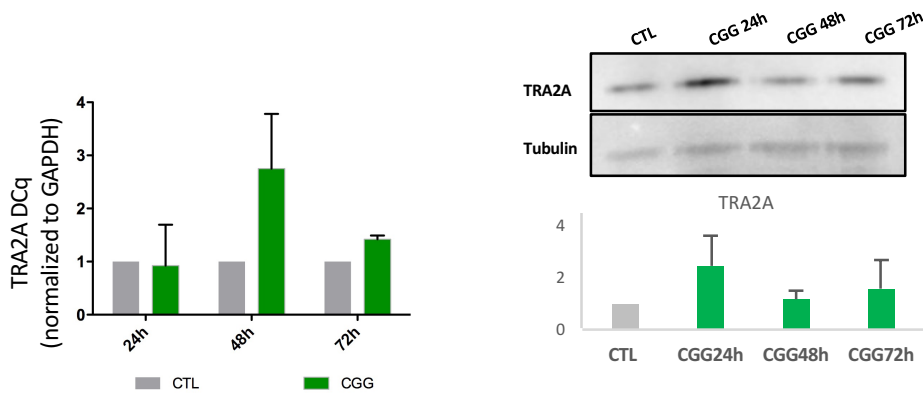

**Supplementary Figure 5 [related to Figure 4]. TRA2A levels in human lymphocytes and COS-7 cell model. A)** Human lymphocytes from control (A) or pre mutation-carrier (B) were lysated and both RNA and protein were isolated (\*\*\*) p-value < 0.01). Relative TRA2A RNA expression (left panel) and TRA2A protein (right panel) are represented. **B)** COS-7 cells were transfected with CGG(60X) and compared to controls. After 24h, 48h or 72h of transfection cells were pelleted and RNA and protein extraction was performed. Relative TRA2A RNA expression (left panel) and TRA2A protein (right panel) are represented.



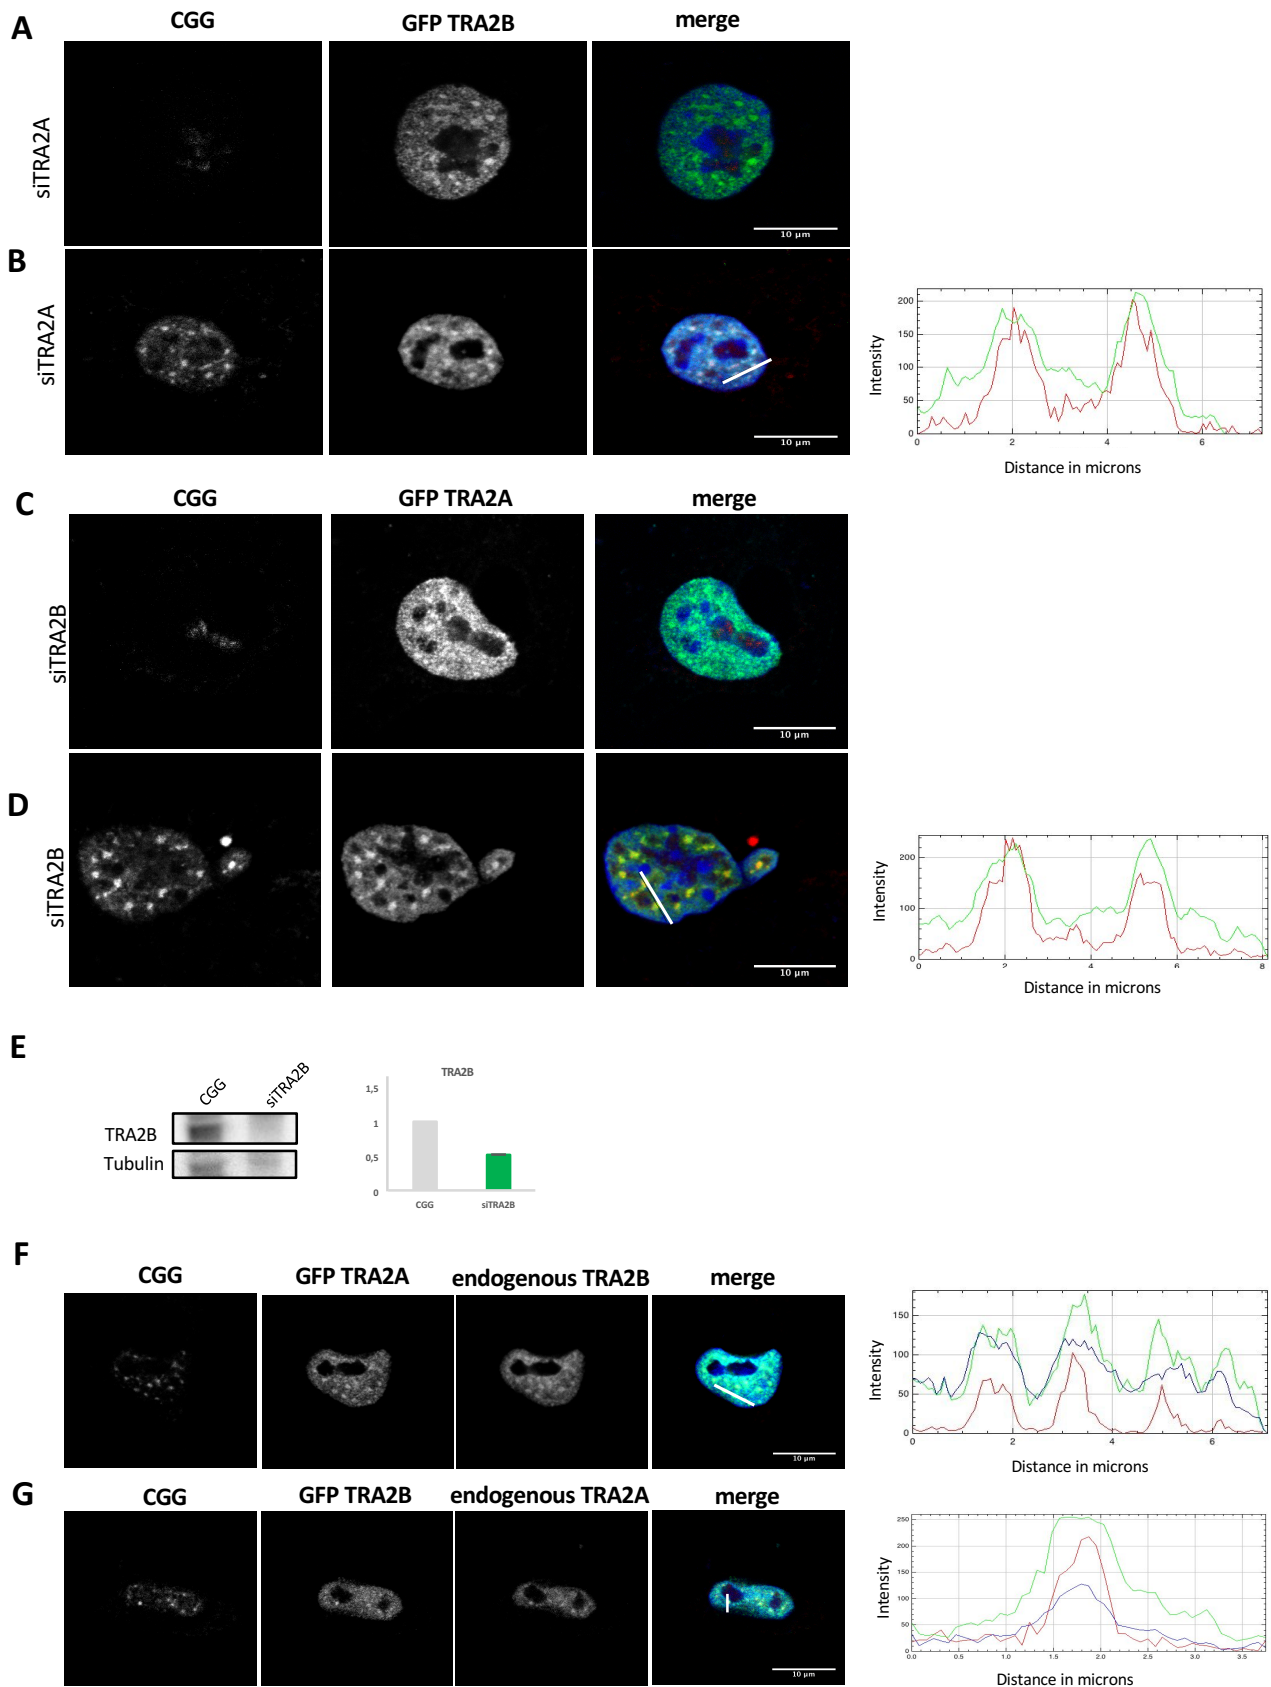

Supplementary Figure 6

**Supplementary Figure 6 [related to Figure 6]. TRA2B over-expression and TRA2A knock-down.**

**A)** Control COS-7 cells (without CGG(60X) transfection) were transfected with GFP-TRA2B and siTRA2A. **B)** COS-7 cells were transfected with CGG(60X), GFP-TRA2B and siTRA2A. In both A and B, after 48 hours, cells were hybridized with Cy3-GGC(8X) probe and immunostained with an antibody against TRA2B. The graph represents TRA2B/CGG levels. **TRA2A over-expression and TRA2B knock-down.** **C)** Control COS-7 cells were transfected with siTRA2B and GFP-TRA2A (in absence of CGG(60X) transfection). **D)** COS-7 cells were transfected with CGG(60X), siTRA2B and GFP-TRA2A. In both A and B, after 48 hours of transfection cells were hybridized with Cy3-GGC(8X) probe and immunostained with antiGFP. The graphs represent TRA2A/CGG levels. **E)** TRA2B protein levels in COS-7 cells treated as in B. **TRA2A and TRA2B over-expression** COS-7 cells were transfected with GFP-TRA2A **F)** or GFP-TRA2B **G)** and CGG(60X). After 48 hours, cells were hybridized with Cy3-GGC(8X) probe and immunostained with an antibody against either TRA2A or TRA2B. Graphs represent TRA2A/TRA2B/CGG levels.

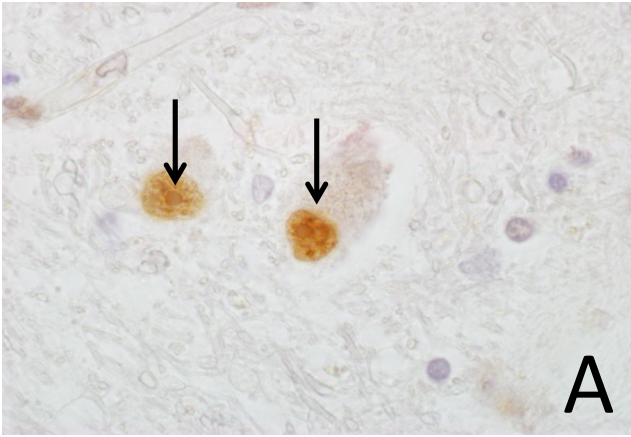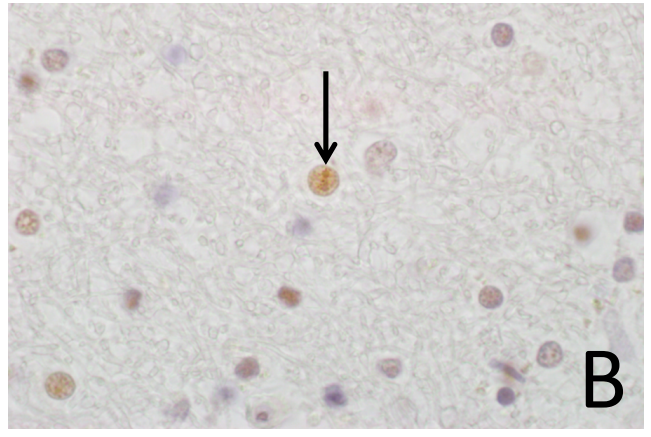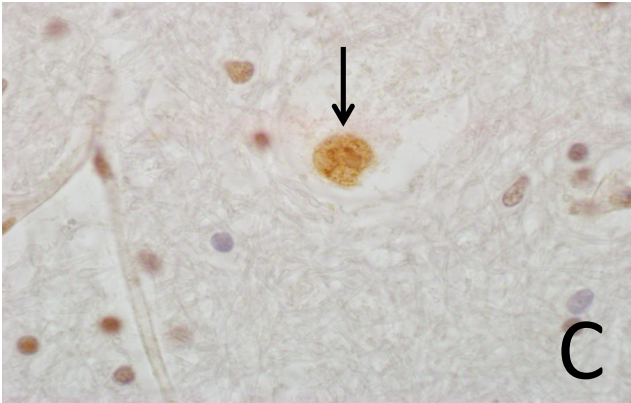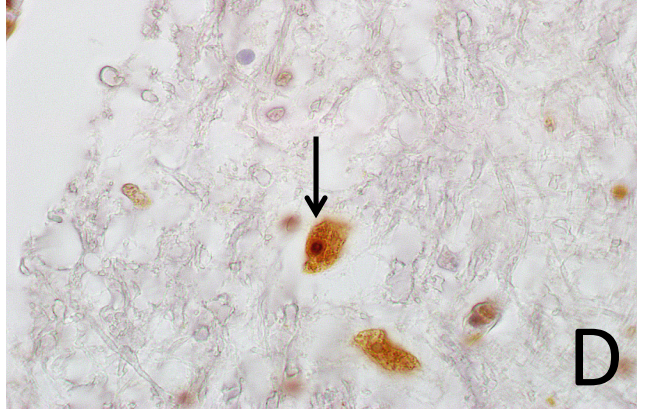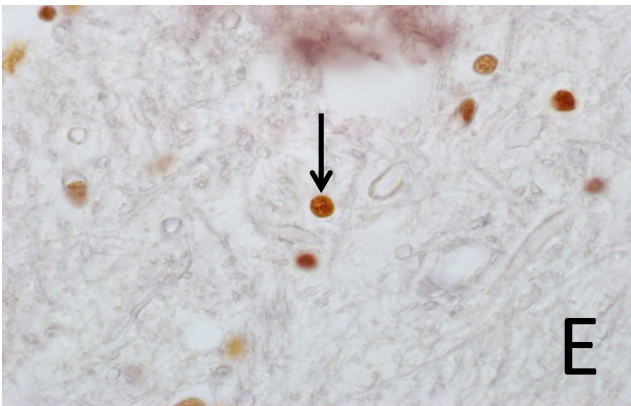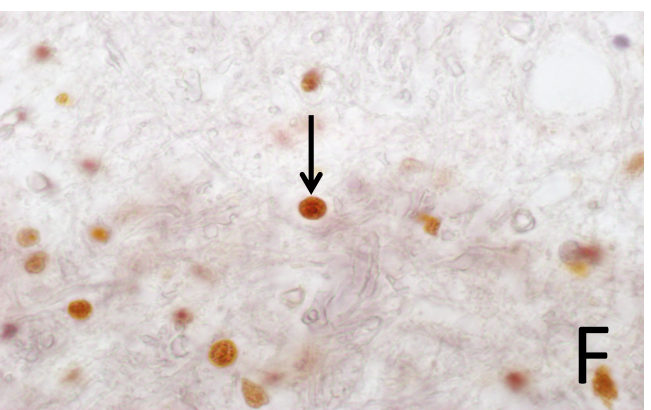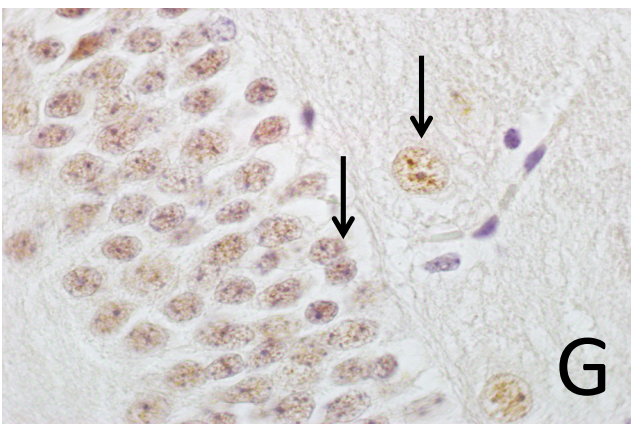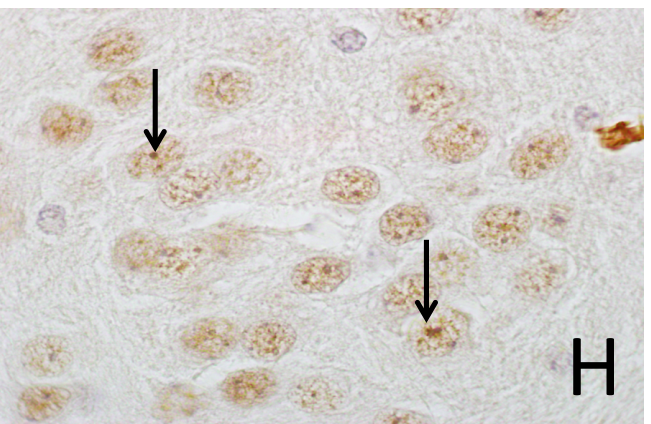

Supplementary Figure 7

**Supplementary Figure 7 [related to Figure 10]. A-F)** TRA2A immunohistochemistry in human hippocampus from FXTAS. **G-H)** TRA2A immunohistochemistry in premutated mouse model (counterstaining is done with haematoxylin; the arrows points to the inclusions).
